# Supplementary material for: Hypersampsones S–W, new polycyclic polyprenylated acylphloroglucinols from Hypericum sampsonii
Source: Royal Society of Chemistry journal article supplement (doi:10.1039/c5ra26332h), 2016-01-01
Supplement: c5ra26332h1.pdf [file c5ra26332h1.pdf]

## Supplementary data

### **Hypersampsones S-W, new polycyclic polyprenylated acylphloroglucinols from *Hypericum sampsonii***

Wen-Jing Tian,<sup>a,c</sup> Yu-Qin Qiu,<sup>b</sup> Jin-Xiao Jie,<sup>d</sup> Hai-Feng Chen,<sup>a</sup> Xiao-Jun Yao,<sup>d,e</sup> Yi

Dai,<sup>\*b</sup> and Xin-Sheng Yao<sup>\*b, c</sup>

<sup>a</sup> School of Pharmaceutical Sciences, Xiamen University, Xiamen 361005, P. R. China.

<sup>b</sup> Institute of Traditional Chinese Medicine & Natural Products, Jinan University, Guangzhou 510632, P. R. China.

<sup>c</sup> College of Traditional Chinese Materia Medica, Shenyang Pharmaceutical University, Shenyang 110016, P. R. China.

<sup>d</sup> College of Chemistry and Chemical Engineering, Lanzhou University, Lanzhou 730000, P. R. China.

<sup>e</sup> State Key Laboratory of Quality Research in Chinese Medicine, Macau Institute for Applied Research in Medicine and Health, Macau University of Science and Technology, Taipa, Macau, P. R. China.

\* Corresponding author: Tel: +86 20 85220785; fax: +86 20 8522 1559

\* E-mail address: tyaoxs@jnu.edu.cn; daiyi1004@163.com

## List of Supporting Information

|                                                                                           |       |
|-------------------------------------------------------------------------------------------|-------|
| 1. Spectral information of <b>1</b> .....                                                 | 4-7   |
| 1.1. UV, IR (KBr disc) and HR-ESI-MS spectrum of <b>1</b> in CH <sub>3</sub> OH .....     | 4     |
| 1.2. 1D and 2D NMR spectra of <b>1</b> in CDCl <sub>3</sub> .....                         | 5-7   |
| 1.2.1 <sup>1</sup> H NMR spectrum of <b>1</b> in CDCl <sub>3</sub> .....                  | 5     |
| 1.2.2 <sup>13</sup> C NMR spectrum of <b>1</b> in CDCl <sub>3</sub> .....                 | 5     |
| 1.2.3 HSQC spectrum of <b>1</b> in CDCl <sub>3</sub> .....                                | 6     |
| 1.2.4 <sup>1</sup> H- <sup>1</sup> H COSY spectrum of <b>1</b> in CDCl <sub>3</sub> ..... | 6     |
| 1.2.5 HMBC spectrum of <b>1</b> in CDCl <sub>3</sub> .....                                | 7     |
| 1.2.6 ROESY spectrum of <b>1</b> in CDCl <sub>3</sub> .....                               | 7     |
| 2. Spectral information of <b>2</b> .....                                                 | 8-11  |
| 2.1. UV, IR (KBr disc) and HR-ESI-MS spectrum of <b>2</b> in CH <sub>3</sub> OH .....     | 8     |
| 2.2. 1D and 2D NMR spectra of <b>2</b> in CDCl <sub>3</sub> .....                         | 9-11  |
| 2.2.1 <sup>1</sup> H NMR spectrum of <b>2</b> in CDCl <sub>3</sub> .....                  | 9     |
| 2.2.2 <sup>13</sup> C NMR spectrum of <b>2</b> in CDCl <sub>3</sub> .....                 | 9     |
| 2.2.3 HSQC spectrum of <b>2</b> in CDCl <sub>3</sub> .....                                | 10    |
| 2.2.4 <sup>1</sup> H- <sup>1</sup> H COSY spectrum of <b>2</b> in CDCl <sub>3</sub> ..... | 10    |
| 2.2.5 HMBC spectrum of <b>2</b> in CDCl <sub>3</sub> .....                                | 11    |
| 3. Spectral information of <b>3</b> .....                                                 | 11-15 |
| 3.1. UV, IR (KBr disc) and HR-ESI-MS spectrum of <b>3</b> in CH <sub>3</sub> OH .....     | 11-12 |
| 3.2. 1D and 2D NMR spectra of <b>3</b> in CDCl <sub>3</sub> .....                         | 13-15 |
| 3.2.1 <sup>1</sup> H NMR spectrum of <b>3</b> in CDCl <sub>3</sub> .....                  | 13    |
| 3.2.2 <sup>13</sup> C NMR spectrum of <b>3</b> in CDCl <sub>3</sub> .....                 | 13    |
| 3.2.3 HSQC spectrum of <b>3</b> in CDCl <sub>3</sub> .....                                | 14    |
| 3.2.4 <sup>1</sup> H- <sup>1</sup> H COSY spectrum of <b>3</b> in CDCl <sub>3</sub> ..... | 14    |
| 3.2.5 HMBC spectrum of <b>3</b> in CDCl <sub>3</sub> .....                                | 15    |
| 3.2.6 ROESY spectrum of <b>3</b> in CDCl <sub>3</sub> .....                               | 15    |
| 4. Spectral information of <b>4</b> .....                                                 | 16-19 |
| 4.1. UV, IR (KBr disc) and HR-ESI-MS spectrum of <b>4</b> in CH <sub>3</sub> OH .....     | 16    |
| 4.2. 1D and 2D NMR spectra of <b>4</b> in CDCl <sub>3</sub> .....                         | 17-19 |
| 4.2.1 <sup>1</sup> H NMR spectrum of <b>4</b> in CDCl <sub>3</sub> .....                  | 17    |
| 4.2.2 <sup>13</sup> C NMR spectrum of <b>4</b> in CDCl <sub>3</sub> .....                 | 17    |
| 4.2.3 HSQC spectrum of <b>4</b> in CDCl <sub>3</sub> .....                                | 18    |
| 4.2.4 <sup>1</sup> H- <sup>1</sup> H COSY spectrum of <b>4</b> in CDCl <sub>3</sub> ..... | 18    |
| 4.2.5 HMBC spectrum of <b>4</b> in CDCl <sub>3</sub> .....                                | 19    |
| 4.2.6 NOESY spectrum of <b>4</b> in CDCl <sub>3</sub> .....                               | 19    |
| 5. Spectral information of <b>5</b> .....                                                 | 20-23 |
| 5.1. UV, IR (KBr disc) and HR-ESI-MS spectrum of <b>5</b> in CH <sub>3</sub> OH .....     | 20    |
| 5.2. 1D and 2D NMR spectra of <b>5</b> in CDCl <sub>3</sub> .....                         | 21-23 |
| 5.2.1 <sup>1</sup> H NMR spectrum of <b>5</b> in CDCl <sub>3</sub> .....                  | 21    |

|       |                                                                                |       |
|-------|--------------------------------------------------------------------------------|-------|
| 5.2.2 | $^{13}\text{C}$ NMR spectrum of <b>5</b> in $\text{CDCl}_3$ .....              | 21    |
| 5.2.3 | HSQC spectrum of <b>5</b> in $\text{CDCl}_3$ .....                             | 22    |
| 5.2.4 | $^1\text{H}$ - $^1\text{H}$ COSY spectrum of <b>5</b> in $\text{CDCl}_3$ ..... | 22    |
| 5.2.5 | HMBC spectrum of <b>5</b> in $\text{CDCl}_3$ .....                             | 23    |
| 5.2.6 | NOESY spectrum of <b>5</b> in $\text{CDCl}_3$ .....                            | 23    |
| 6.    | Computational details of <b>2</b> and <b>3</b> .....                           | 24-26 |
| 7.    | Bioassays .....                                                                | 27-28 |
| 7.1   | RXR $\alpha$ transcriptional-inhibitory activities.....                        | 27    |
| 7.2   | Cytotoxicity assay .....                                                       | 28    |

## UV spectrum of hypersampsonse S (1) in CH<sub>3</sub>OH.

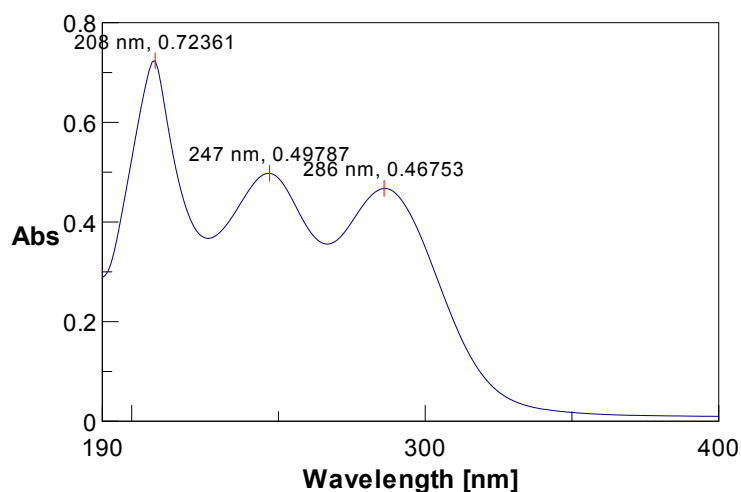

## IR (KBr disc) spectrum of hypersampsonse S (1).

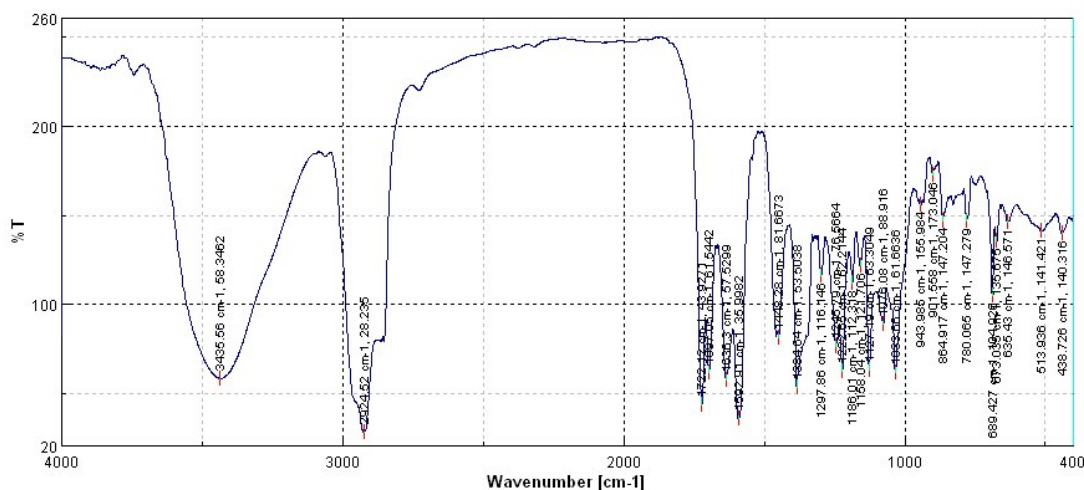

## HR-ESI-MS spectrum of hypersampsonse S (1).

### Single Mass Analysis

Tolerance = 5.0 PPM / DBE: min = -1.5, max = 50.0

Element prediction: Off

Number of isotope peaks used for i-FIT = 3

Monoisotopic Mass, Even Electron Ions

173 formula(e) evaluated with 1 results within limits (up to 50 best isotopic matches for each mass)

Elements Used:

C: 0-500 H: 0-1000 O: 0-200

HSD5F8B-3

20130511-39 266 (2.147) Cm (258:273)

1: TOF MS ES+  
7.55e+006

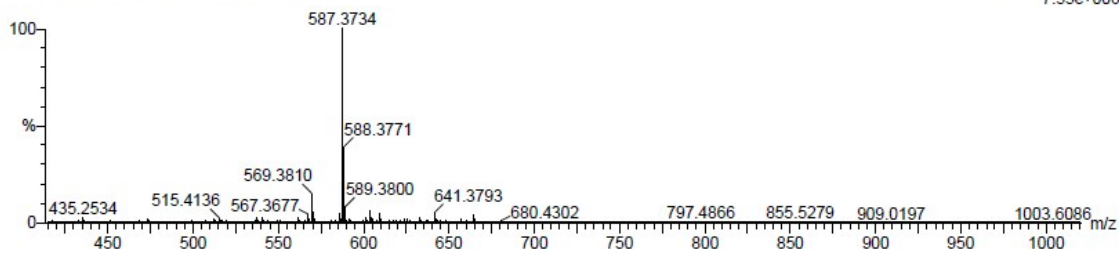

Minimum: -1.5  
Maximum: 5.0 5.0 50.0

| Mass     | Calc. Mass | mDa  | PPM  | DBE  | i-FIT  | Norm | Conf (%) | Formula    |
|----------|------------|------|------|------|--------|------|----------|------------|
| 587.3734 | 587.3736   | -0.2 | -0.3 | 13.5 | 1517.1 | n/a  | n/a      | C38 H51 O5 |

### $^1\text{H}$ NMR (AV-300, 300 MHz) spectrum of hypersampson S (1) in $\text{CDCl}_3$

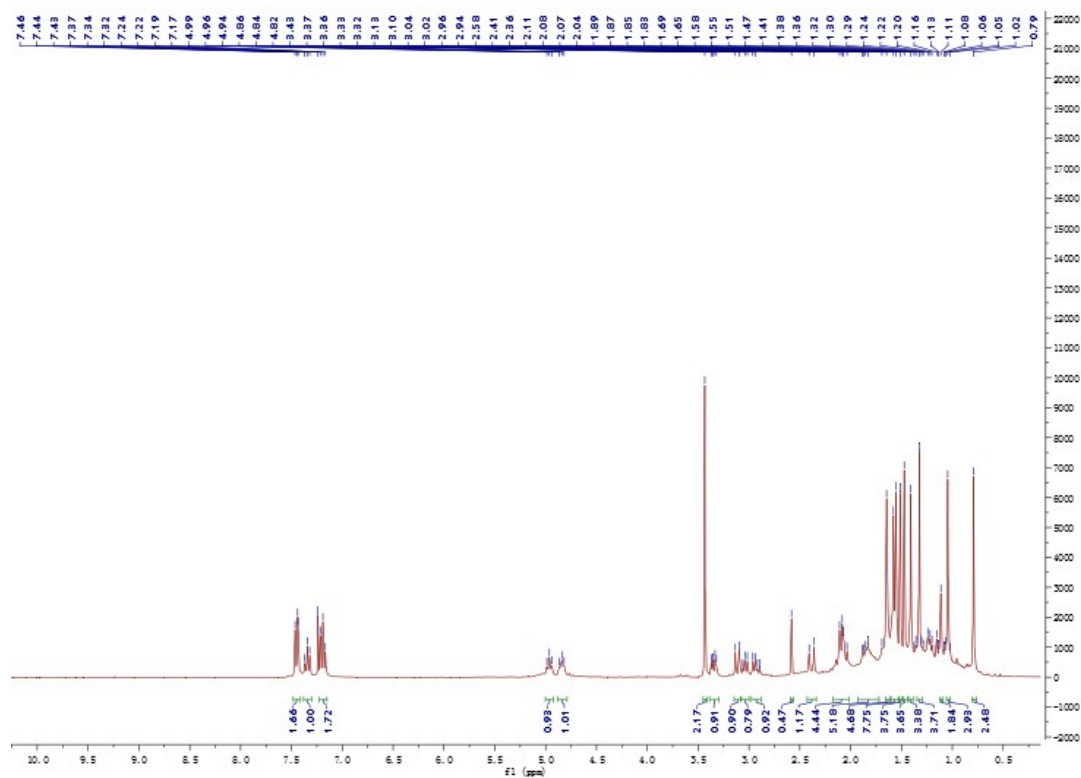

### $^{13}\text{C}$ NMR spectrum (AV-300, 75 MHz) of hypersampson S (1) in $\text{CDCl}_3$

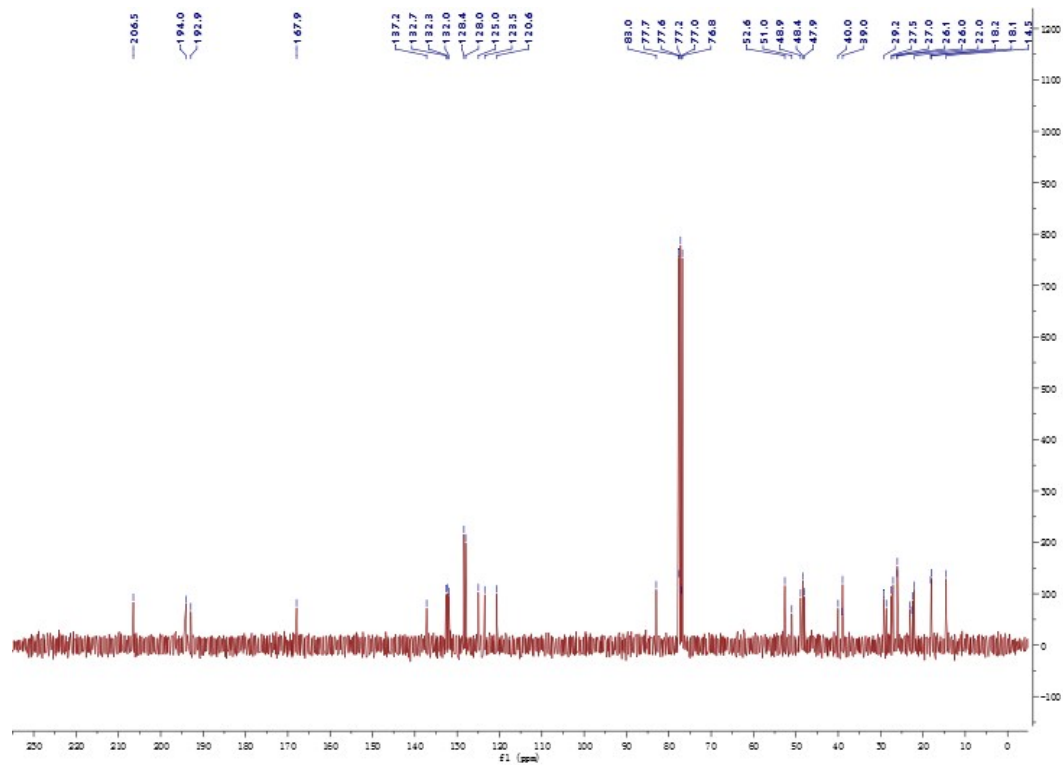

HSQC spectrum (AV-400) of hypersampsones S (1) in CDCl<sub>3</sub>

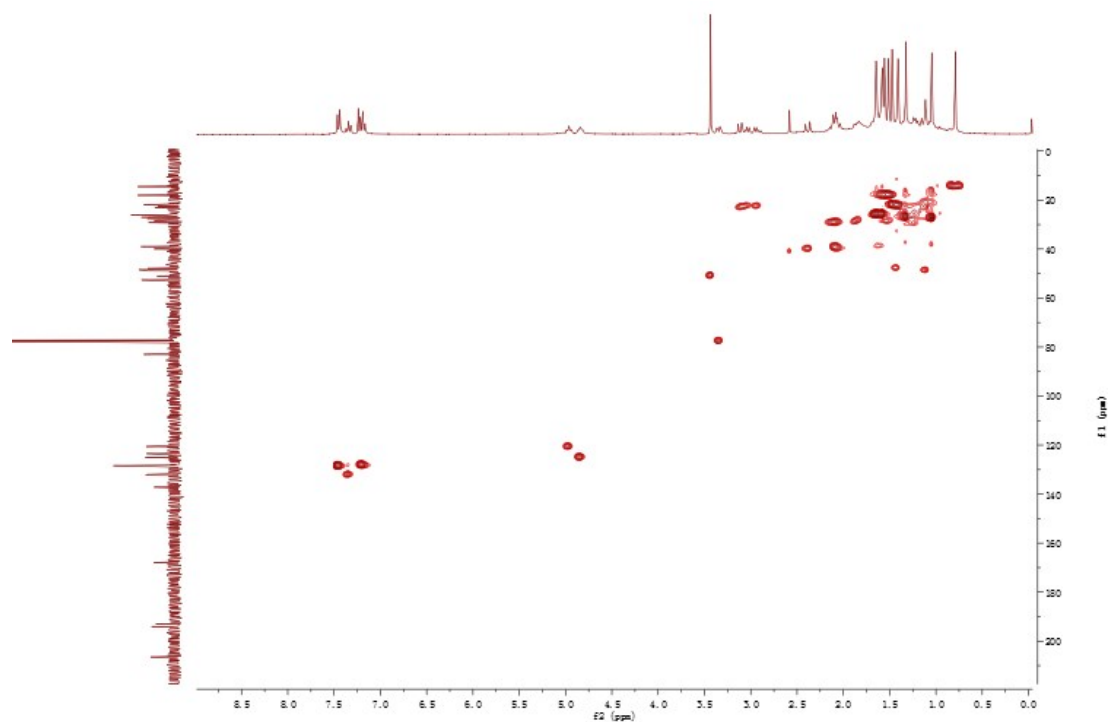

<sup>1</sup>H-<sup>1</sup>H COSY spectrum (AV-400) of hypersampsones S (1) in CDCl<sub>3</sub>

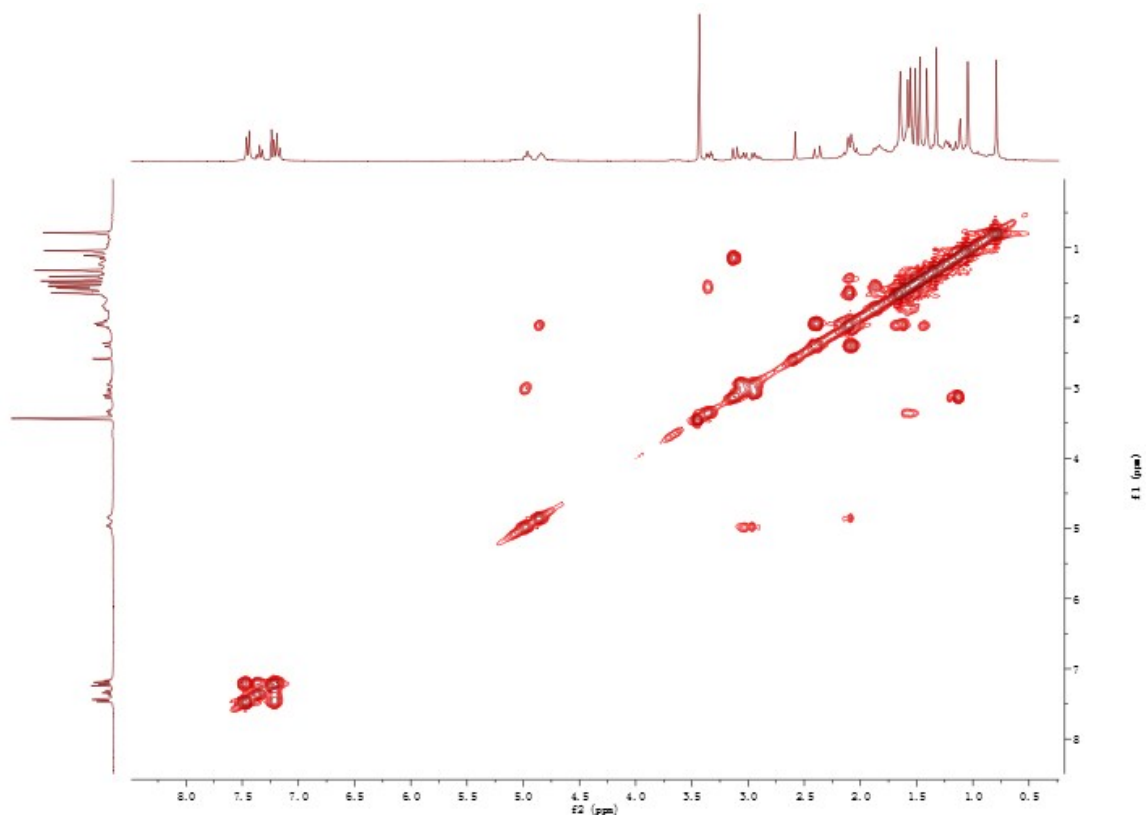

HMBC spectrum (AV-400) of hypersampsonse S (1) in CDCl<sub>3</sub>

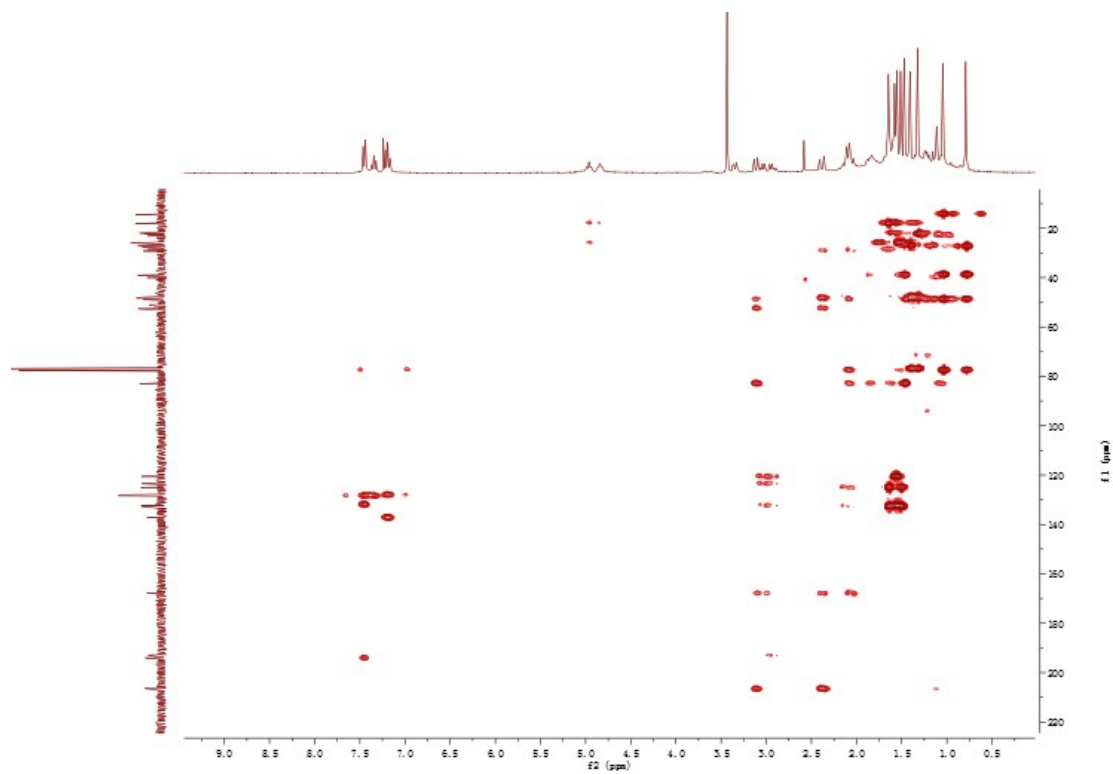

NOESY spectrum (AV-600) of hypersampsonse S (1) in CDCl<sub>3</sub>

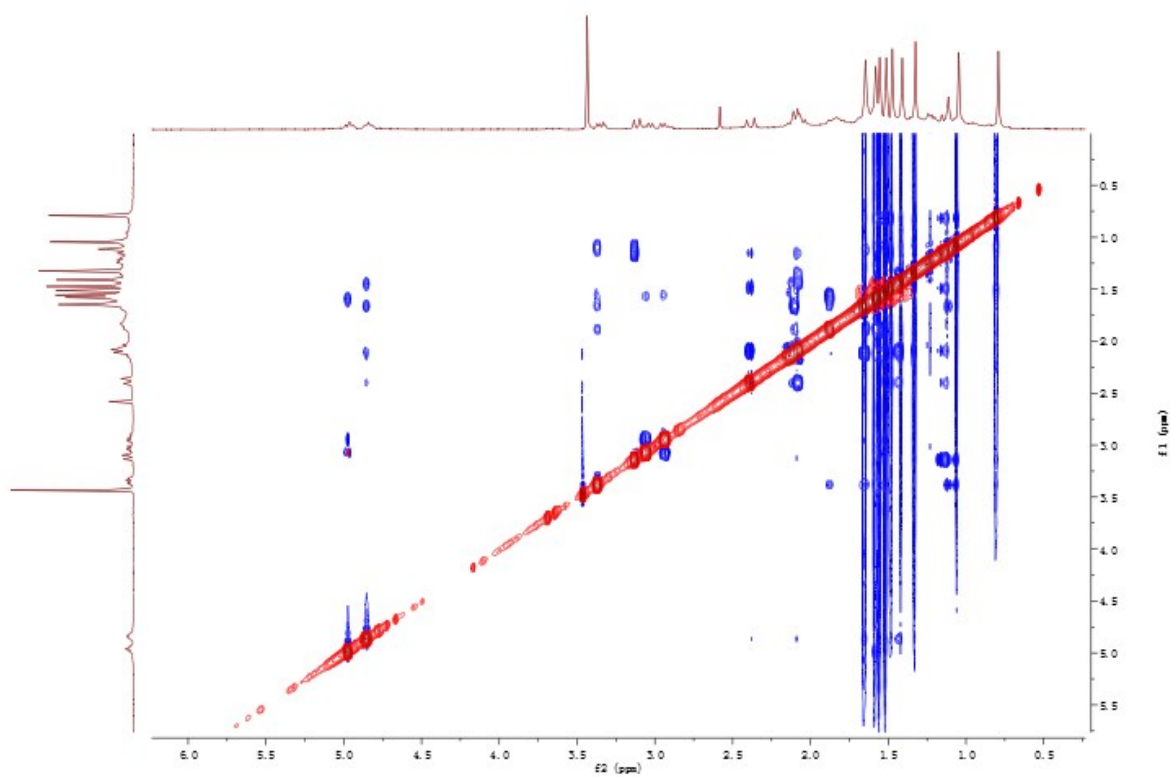

### UV spectrum of hypersampsonse T (2) in CH<sub>3</sub>OH.

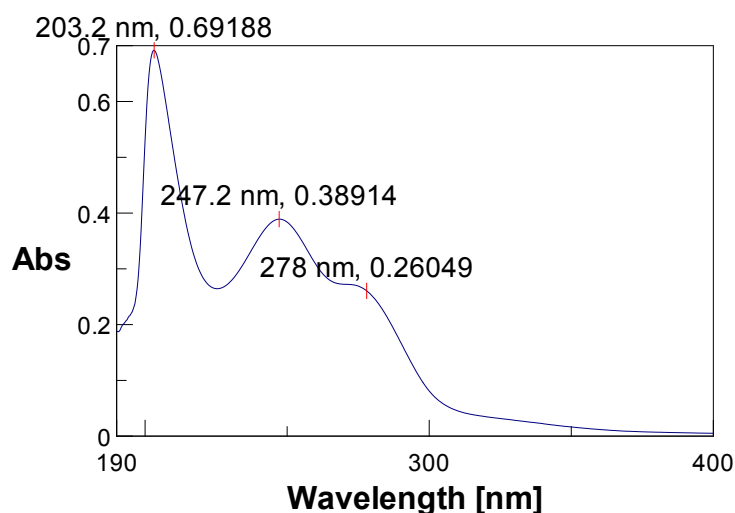

### IR (KBr disc) spectrum of hypersampsonse T (2).

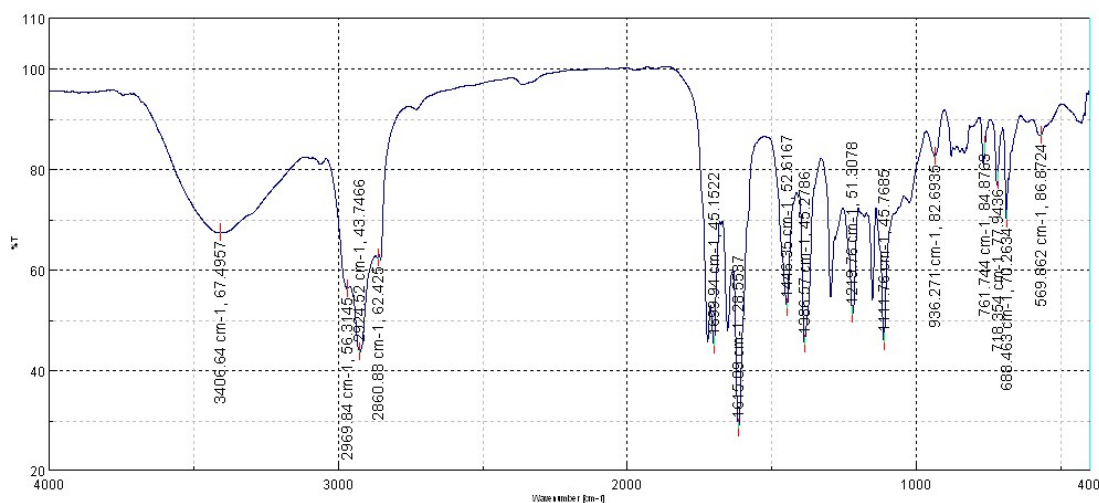

### HR-ESI-MS spectrum of hypersampsonse T (2).

#### Single Mass Analysis

Tolerance = 10.0 PPM / DBE: min = -1.5, max = 50.0

Element prediction: Off

Number of isotope peaks used for i-FIT = 3

Monoisotopic Mass, Even Electron Ions

133 formula(e) evaluated with 2 results within limits (up to 50 closest results for each mass)

Elements Used:

C: 0-500 H: 0-1000 O: 0-200

HSD1E-4

20131016-02 275 (2.214) Cm (274:277)

1: TOF MS ES+  
2.59e+005

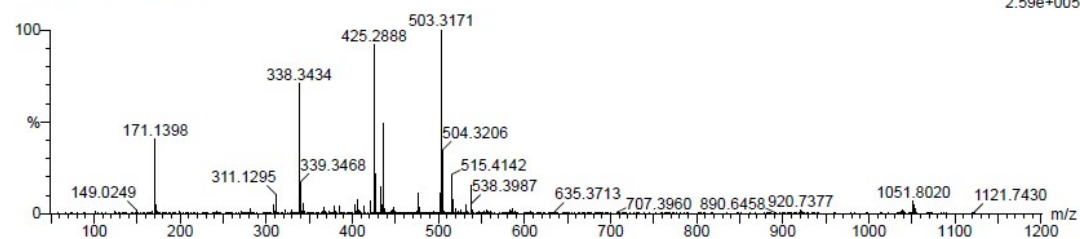

Minimum: -1.5  
Maximum: 50.0

| Mass     | Calc. Mass | mDa  | PPM  | DBE  | i-FIT | Norm  | Conf (%) | Formula    |
|----------|------------|------|------|------|-------|-------|----------|------------|
| 503.3171 | 503.3161   | 1.0  | 2.0  | 12.5 | 447.6 | 0.001 | 99.88    | C33 H43 O4 |
|          | 503.3220   | -4.9 | -9.7 | 3.5  | 454.3 | 6.691 | 0.12     | C26 H47 O9 |



**$^1\text{H}$  NMR (AV-600, 600 MHz) spectrum of hypersampson T (2) in  $\text{CDCl}_3$**

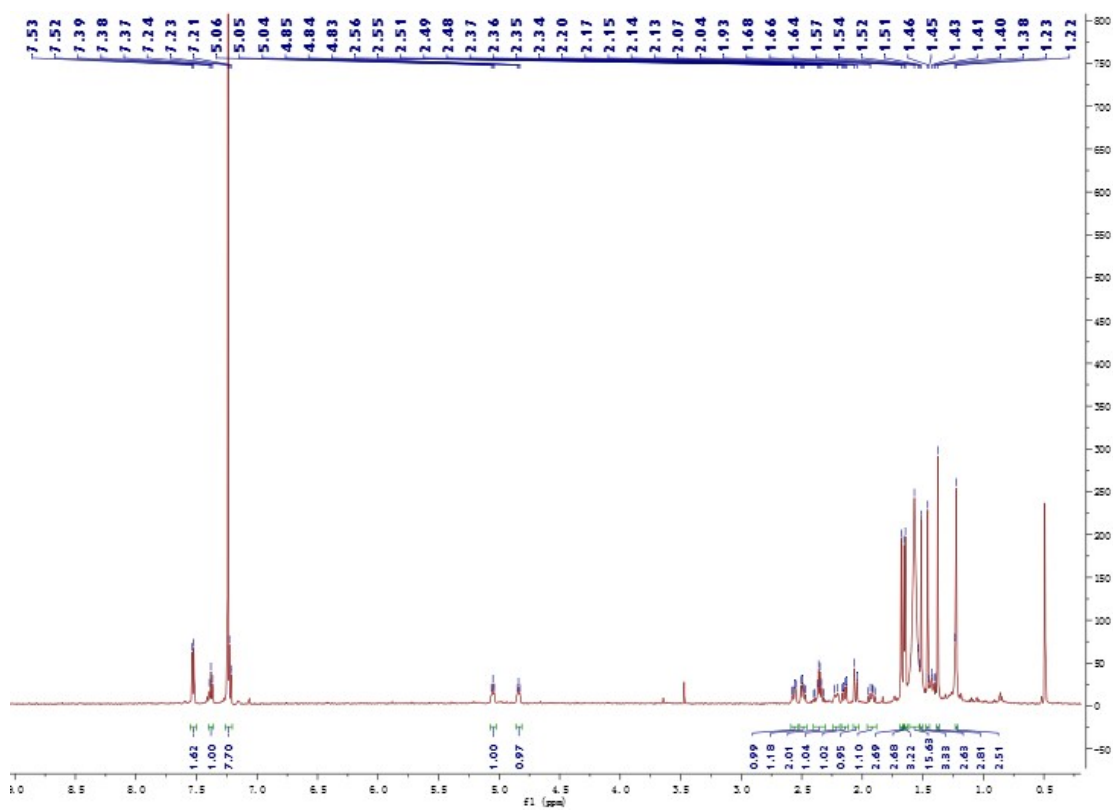

**$^{13}\text{C}$  NMR spectrum (AV-300, 75 MHz) of hypersampson T (2) in  $\text{CDCl}_3$**

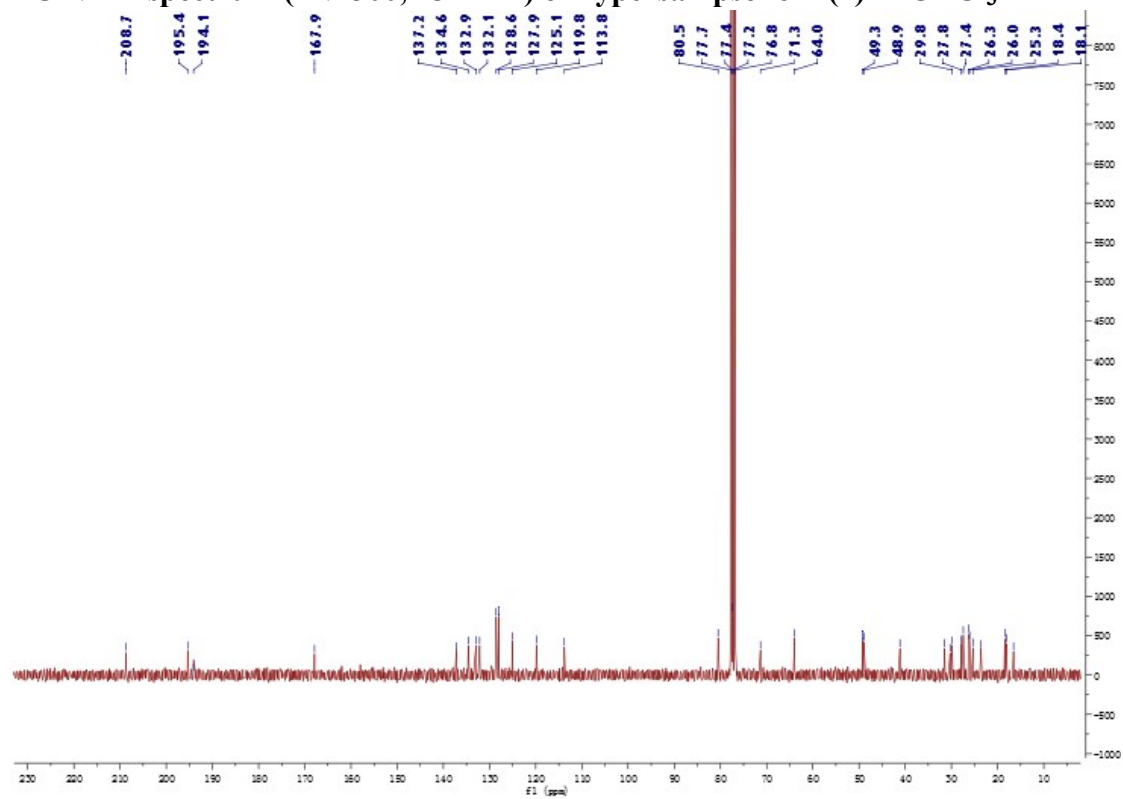

HSQC spectrum (AV-400) of hypersampsonone T (2) in CDCl<sub>3</sub>

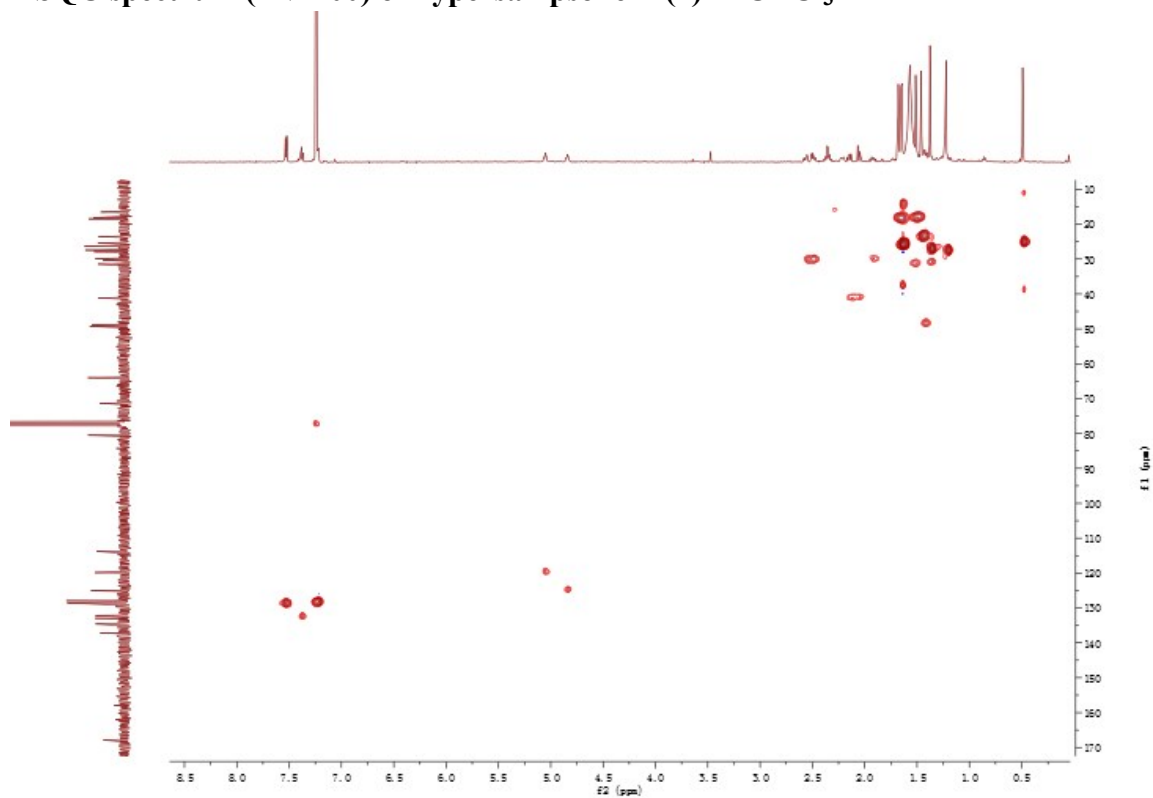

<sup>1</sup>H-<sup>1</sup>H COSY spectrum (AV-400) of hypersampsonone T (2) in CDCl<sub>3</sub>

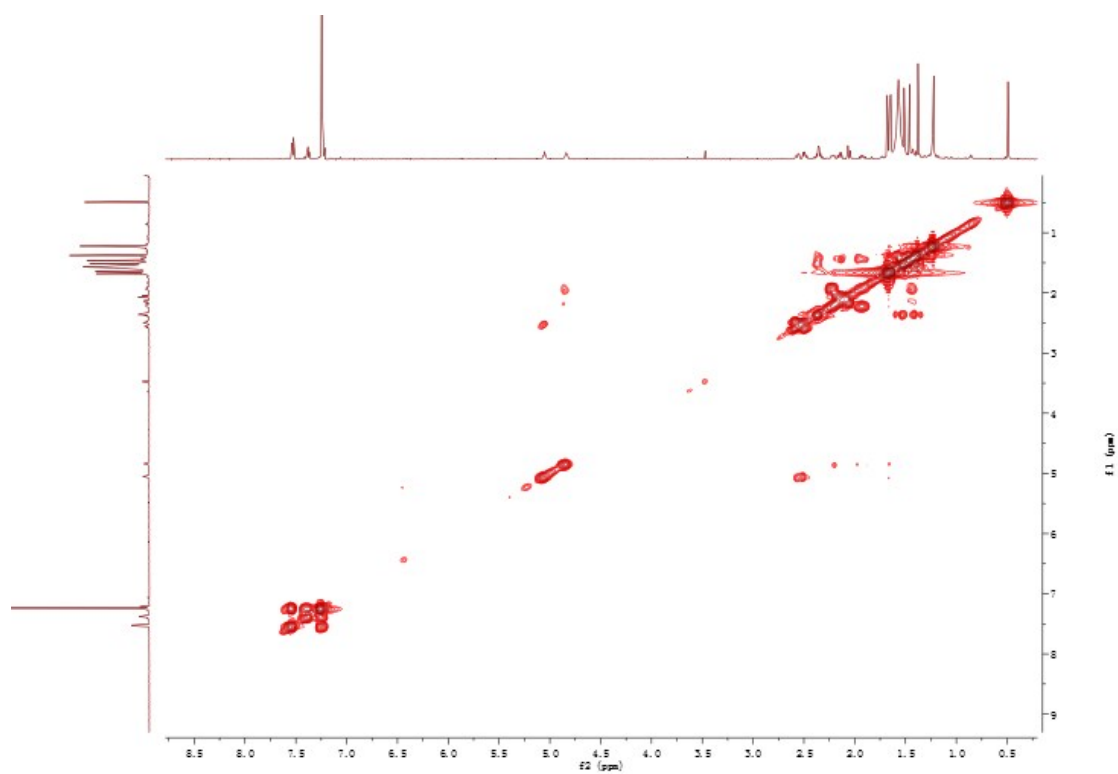

HMBC spectrum (AV-400) of hypersampsonone T (2) in CDCl<sub>3</sub>

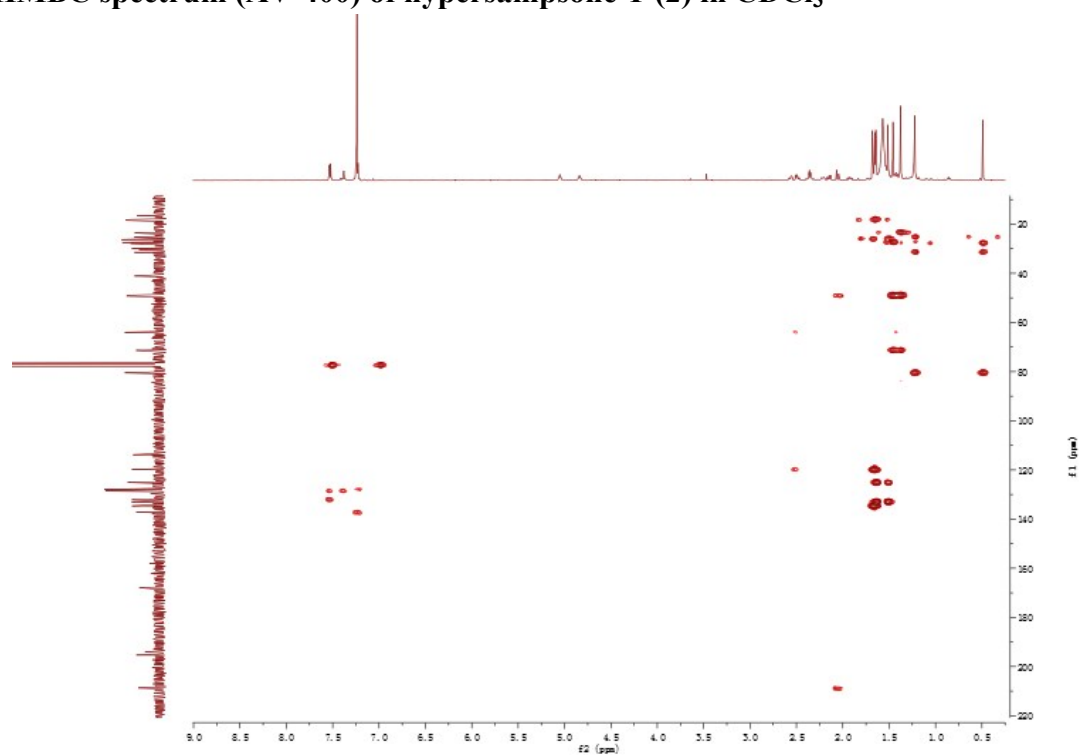

UV spectrum of hypersampsonone U (3) in CH<sub>3</sub>OH.

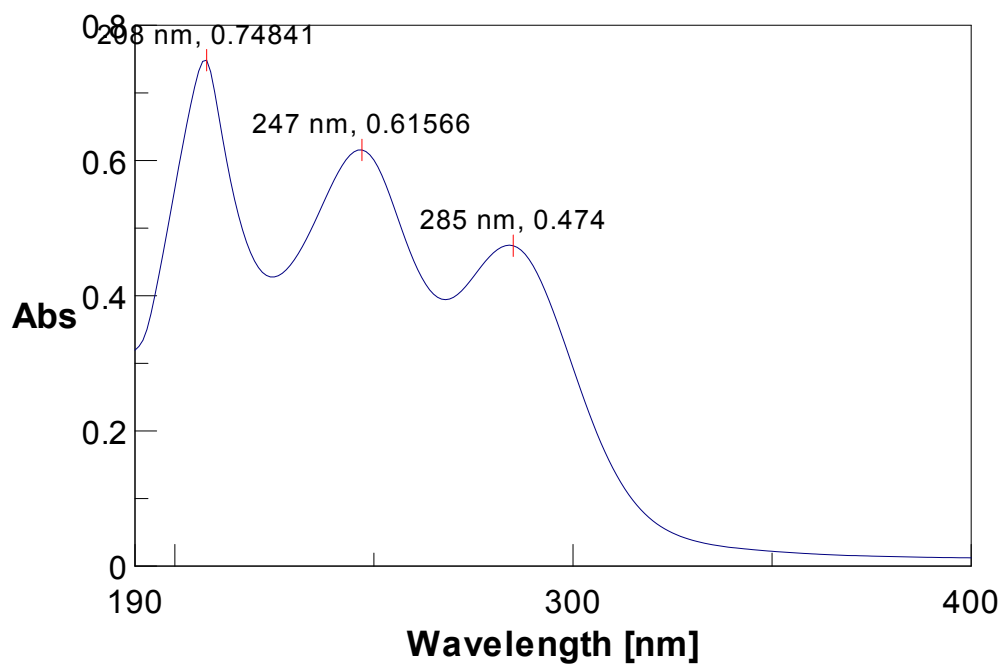

## IR (KBr disc) spectrum of hypersampson U (3).

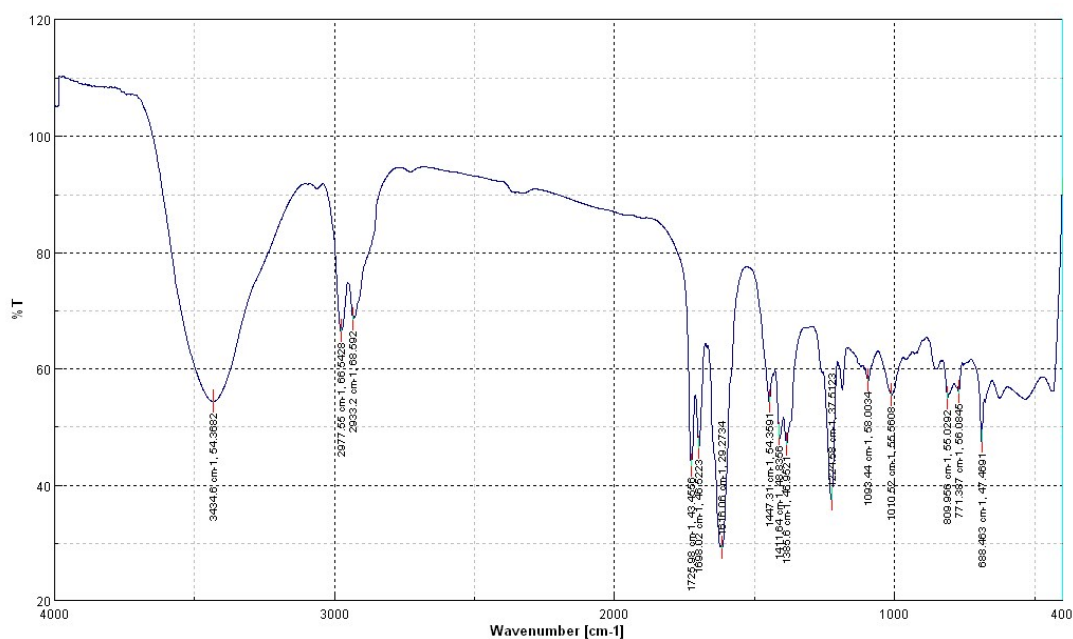

## HR-ESI-MS spectrum of hypersampson U (3).

### Single Mass Analysis

Tolerance = 5.0 PPM / DBE: min = -1.5, max = 50.0

Element prediction: Off

Number of isotope peaks used for i-FIT = 3

Monoisotopic Mass, Even Electron Ions

140 formula(e) evaluated with 1 results within limits (up to 50 best isotopic matches for each mass)

Elements Used:

C: 0-500 H: 0-1000 O: 0-200

HSD5F6B3-7

20130422-6 245 (1.978) Cm (228:253)

1: TOF MS ES+  
1.06e+007

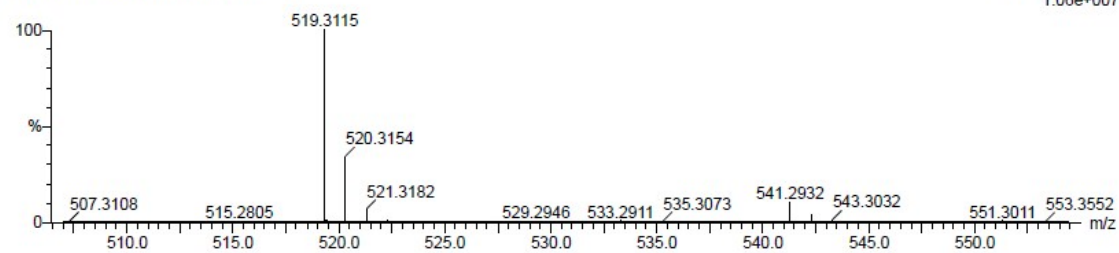

Minimum: -1.5  
Maximum: 5.0 5.0 50.0

| Mass     | Calc. Mass | mDa | PPM | DBE  | i-FIT  | Norm | Conf (%) | Formula    |
|----------|------------|-----|-----|------|--------|------|----------|------------|
| 519.3115 | 519.3110   | 0.5 | 1.0 | 12.5 | 1674.5 | n/a  | n/a      | C33 H43 O5 |

**$^1\text{H}$  NMR (AV-300, 300 MHz) spectrum of hypersampsonse U (3) in  $\text{CDCl}_3$**

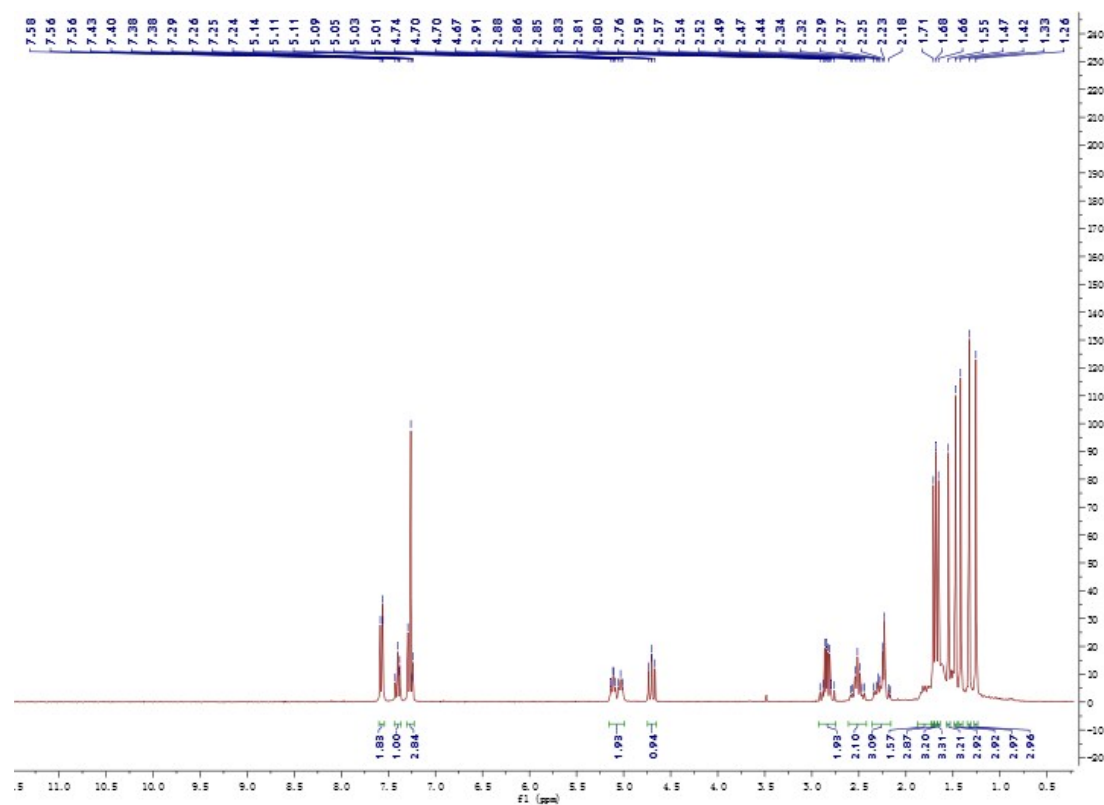

**$^{13}\text{C}$  NMR spectrum (AV-400, 100 MHz) of hypersampsonse U (3) in  $\text{CDCl}_3$**

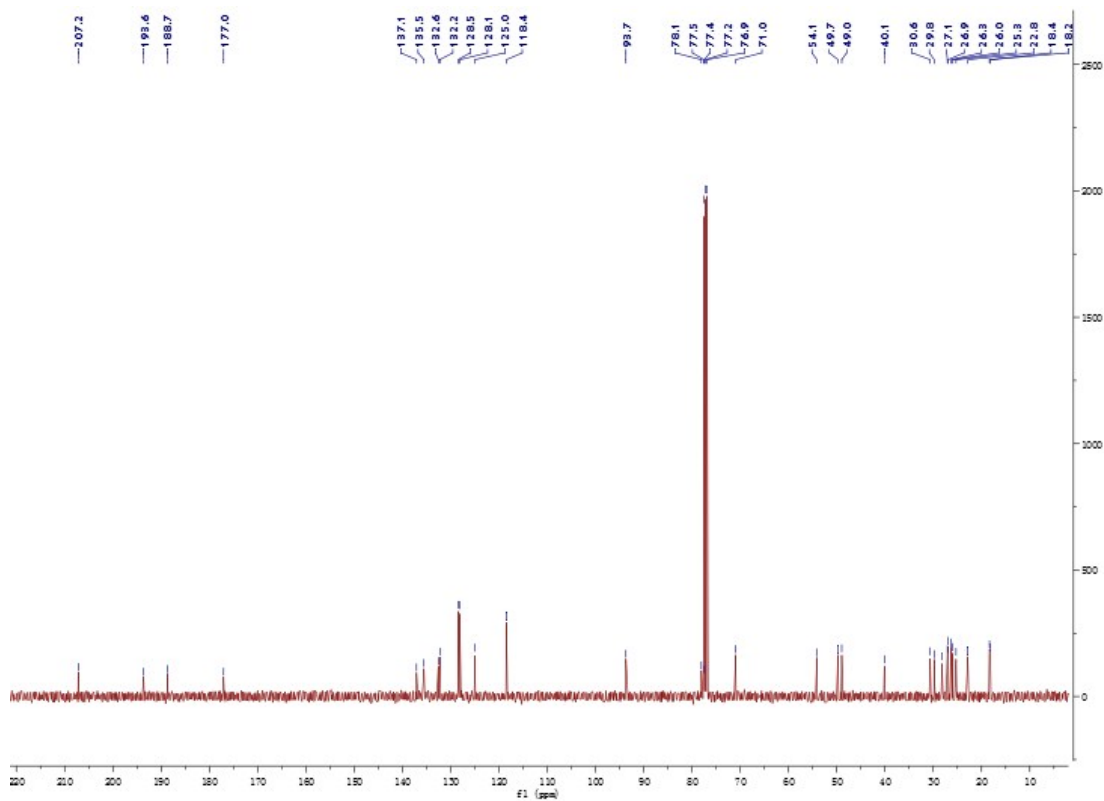

HSQC spectrum (AV-400) of hypersampsonone U (3) in CDCl<sub>3</sub>

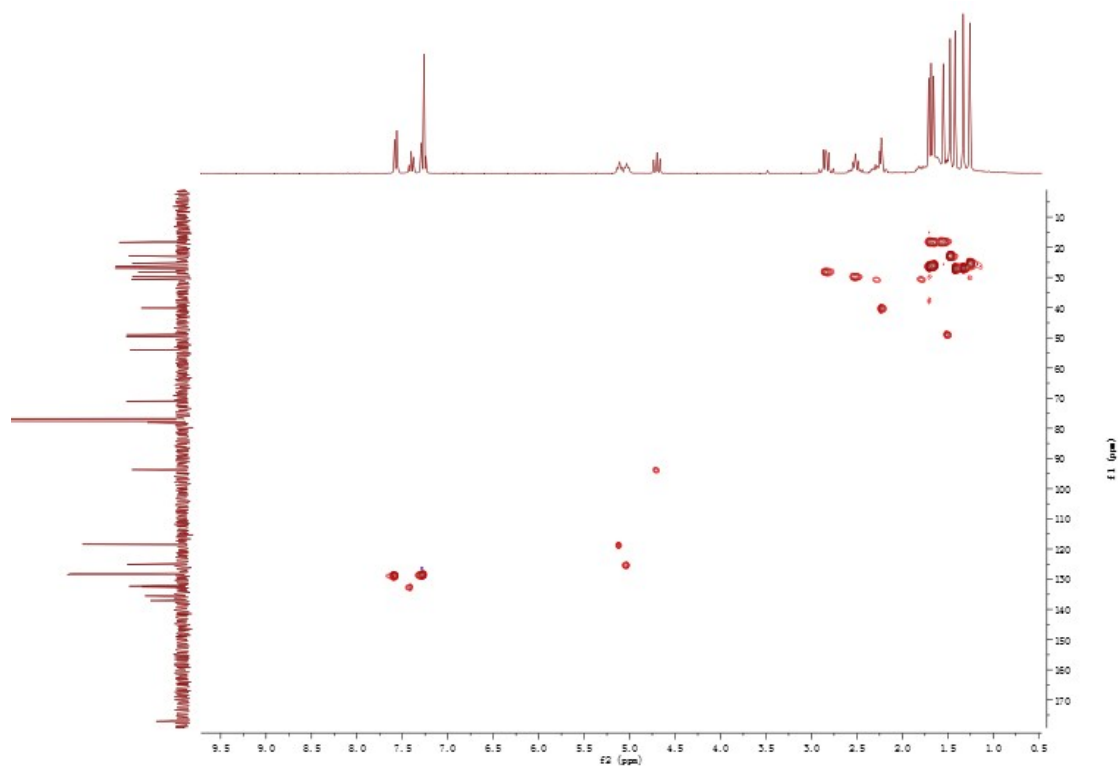

<sup>1</sup>H-<sup>1</sup>H COSY spectrum (AV-400) of hypersampsonone U (3) in CDCl<sub>3</sub>

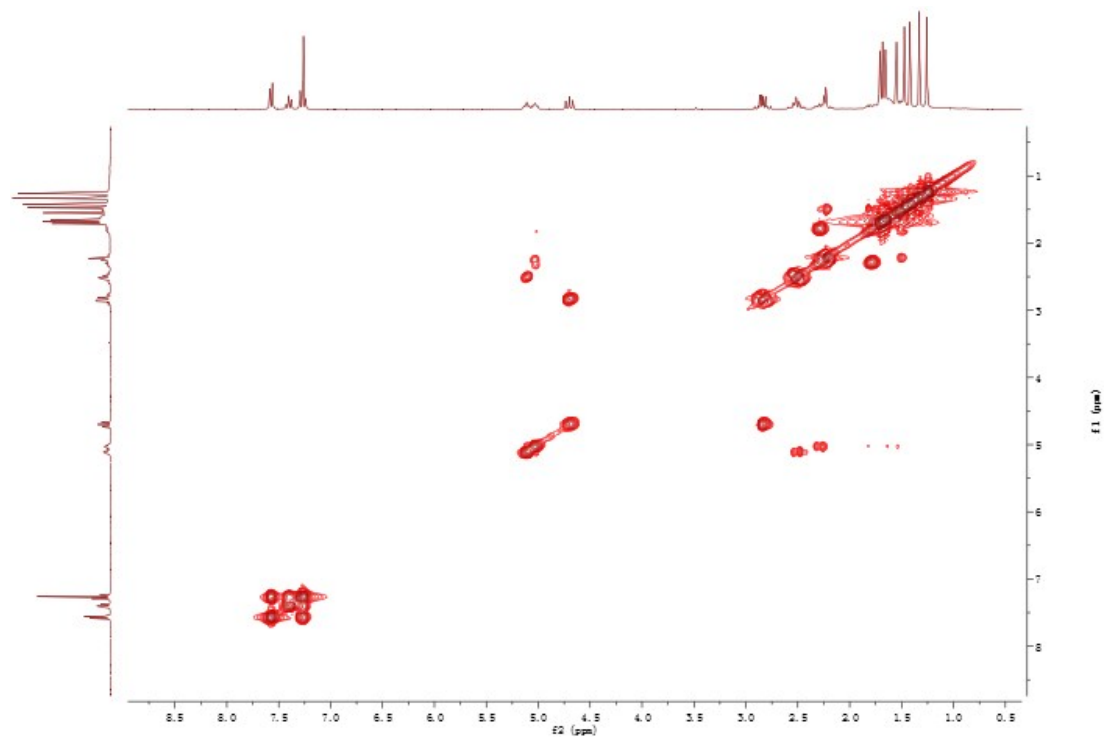

HMBC spectrum (AV-400) of hypersampsonone U (3) in CDCl<sub>3</sub>

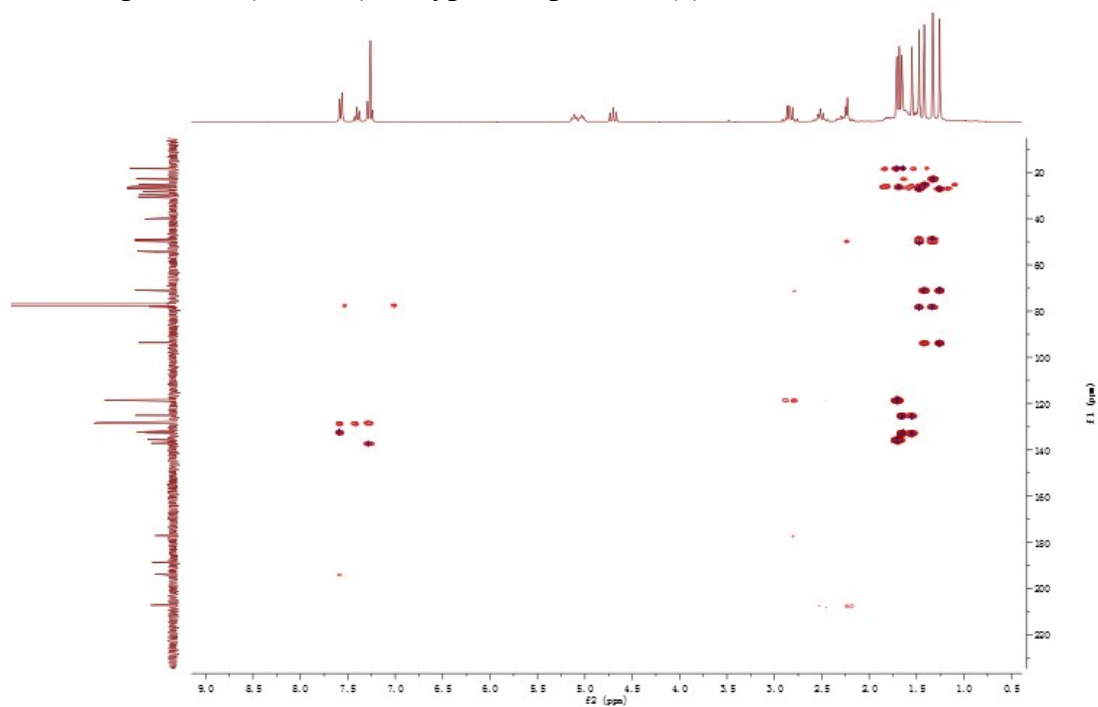

NOESY spectrum (AV-400) of hypersampsonone U (3) in CDCl<sub>3</sub>

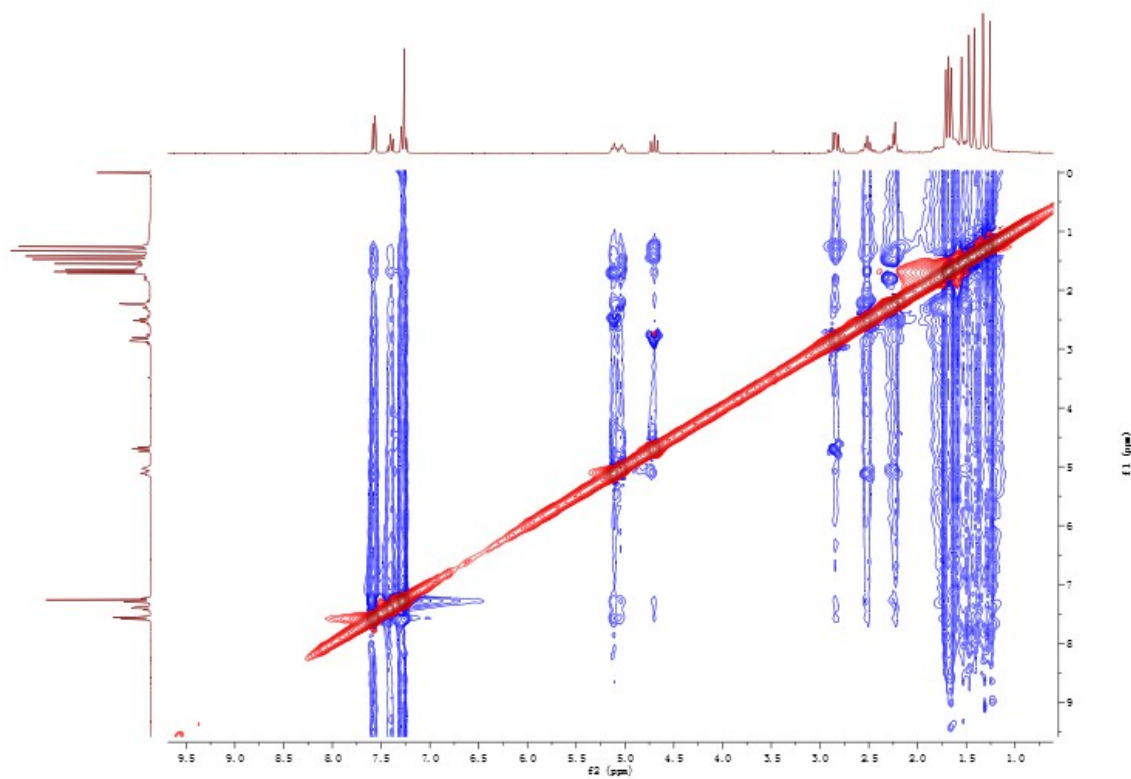

### UV spectrum of hypersampson V (4) in CH<sub>3</sub>OH.

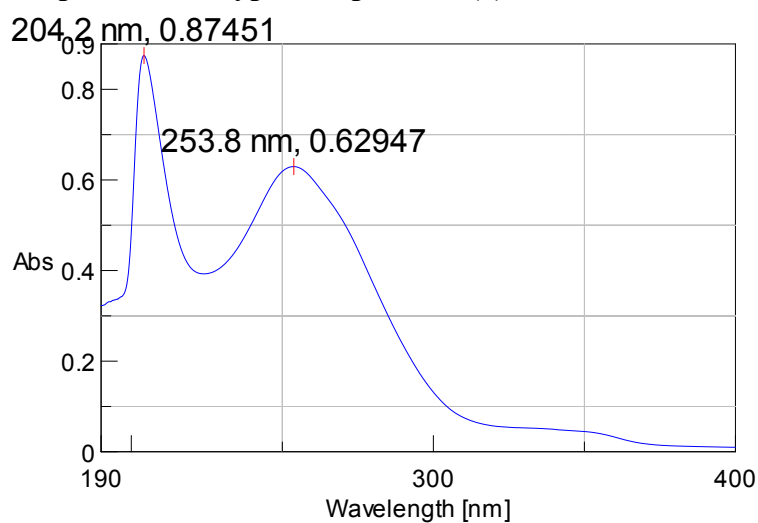

### IR (KBr disc) spectrum of hypersampson Q (4).

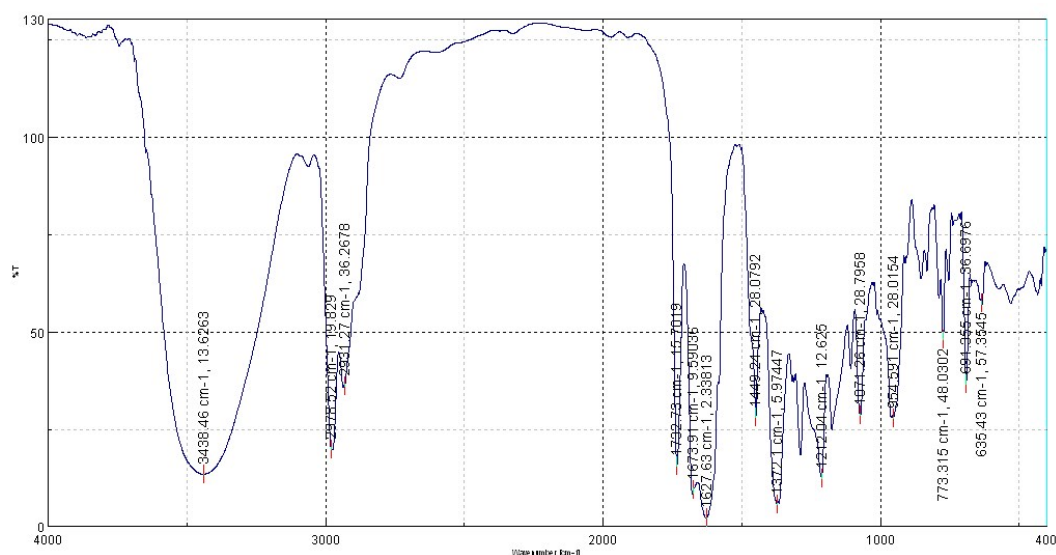

### HR-ESI-MS spectrum of hypersampson Q (4).

#### Single Mass Analysis

Tolerance = 5.0 mDa / DBE: min = -1.5, max = 50.0

Element prediction: Off

Number of isotope peaks used for i-FIT = 3

Monoisotopic Mass, Even Electron Ions

150 formula(e) evaluated with 1 results within limits (up to 50 best isotopic matches for each mass)

Elements Used:

C: 0-500 H: 0-1000 O: 0-200

HSD7K2-1-4

20141201-28 685 (5.493)

1: TOF MS ES+  
4.29e+005

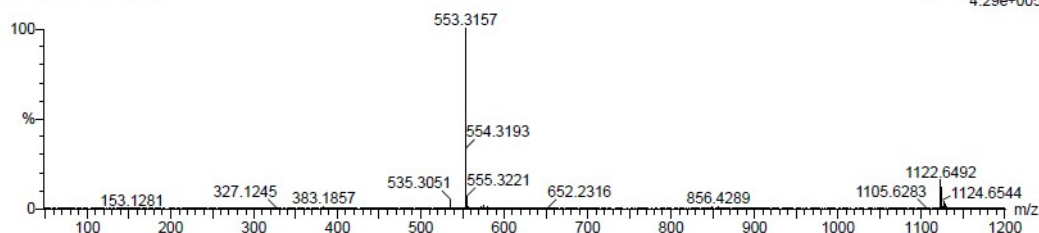

Minimum: -1.5  
Maximum: 50.0

| Mass     | Calc. Mass | mDa  | PPM  | DBE  | i-FIT | Norm | Conf (%) | Formula    |
|----------|------------|------|------|------|-------|------|----------|------------|
| 553.3157 | 553.3165   | -0.8 | -1.4 | 11.5 | 276.9 | n/a  | n/a      | C33 H45 O7 |



**<sup>1</sup>H NMR (AV-400, 400 MHz) spectrum of hypersampson V (4) in CDCl<sub>3</sub>**

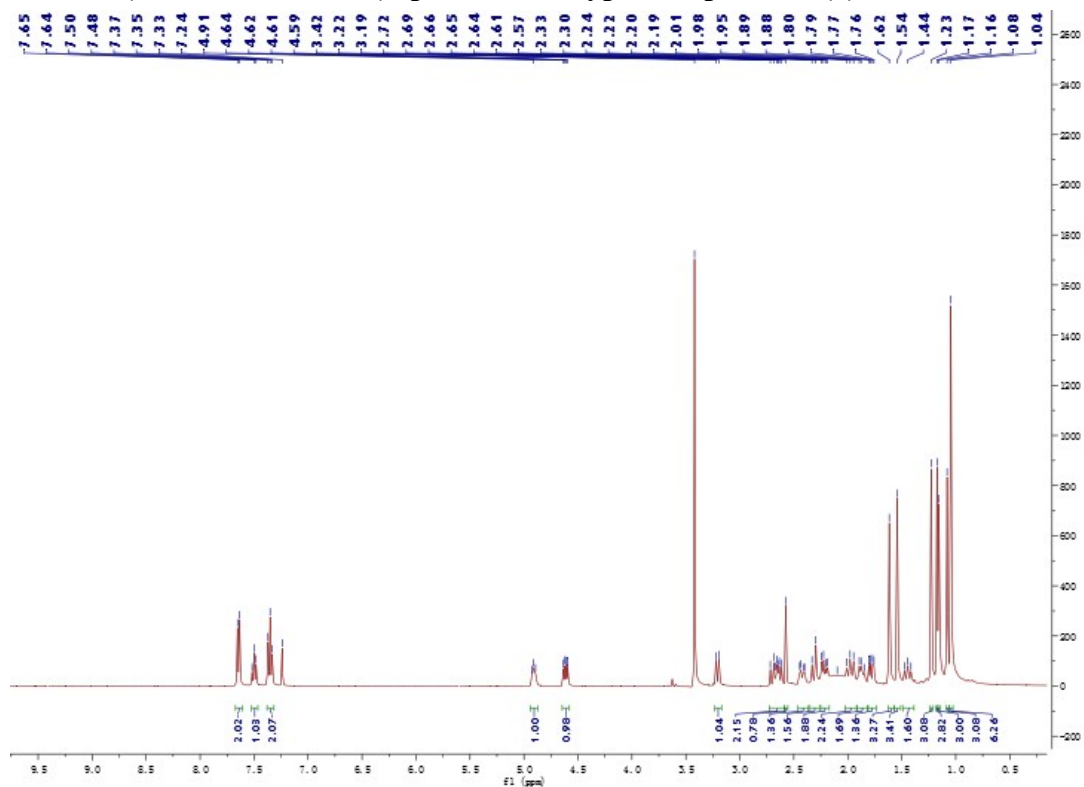

**<sup>13</sup>C NMR spectrum (AV-400, 100 MHz) of hypersampson V (4) in CDCl<sub>3</sub>**

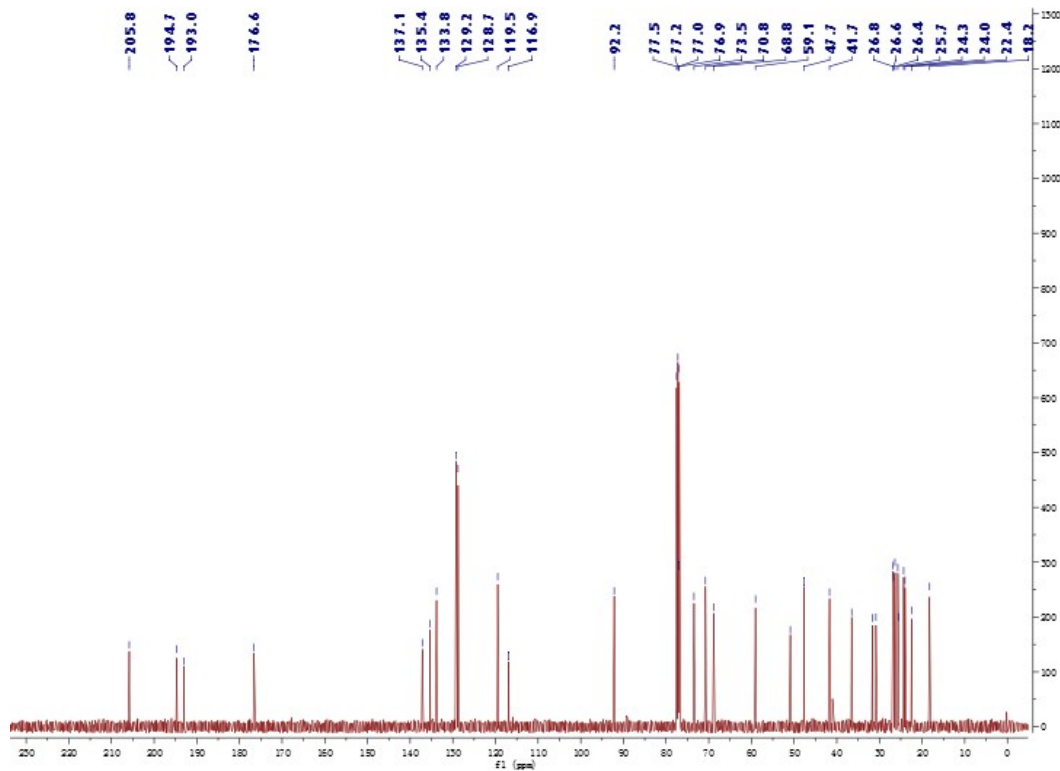

HSQC spectrum (AV-400) of hypersampsonone V (4) in CDCl<sub>3</sub>

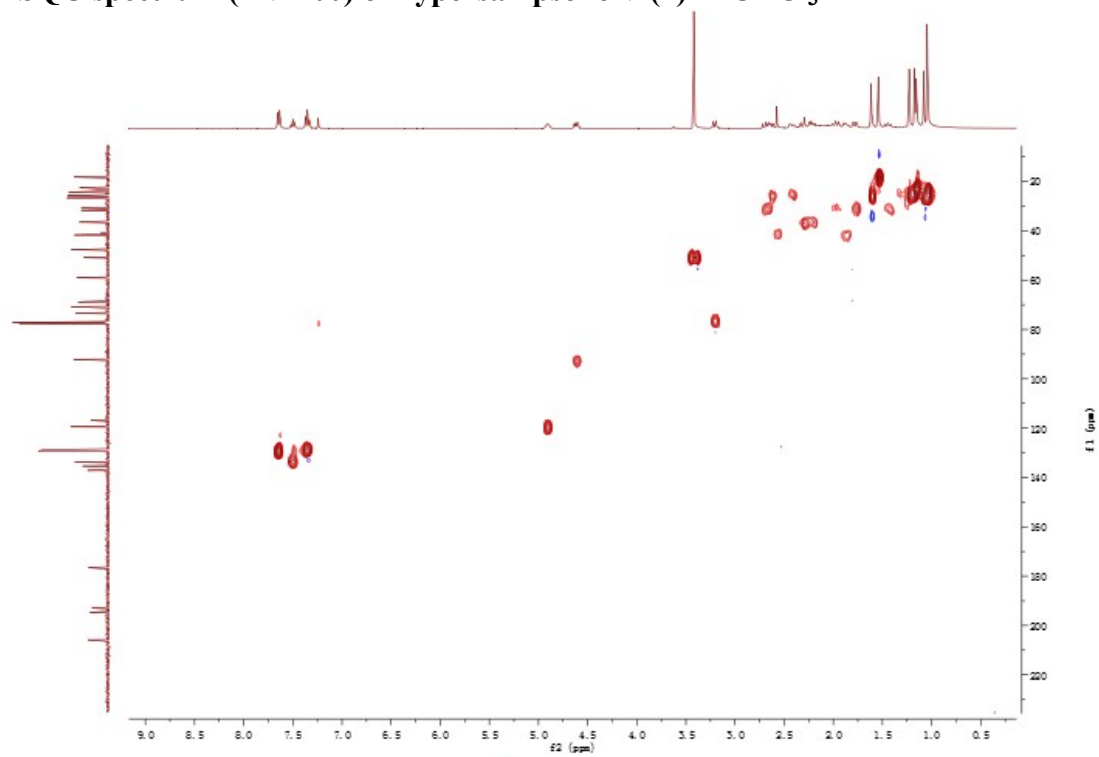

<sup>1</sup>H-<sup>1</sup>H COSY spectrum (AV-400) of hypersampsonone V (4) in CDCl<sub>3</sub>

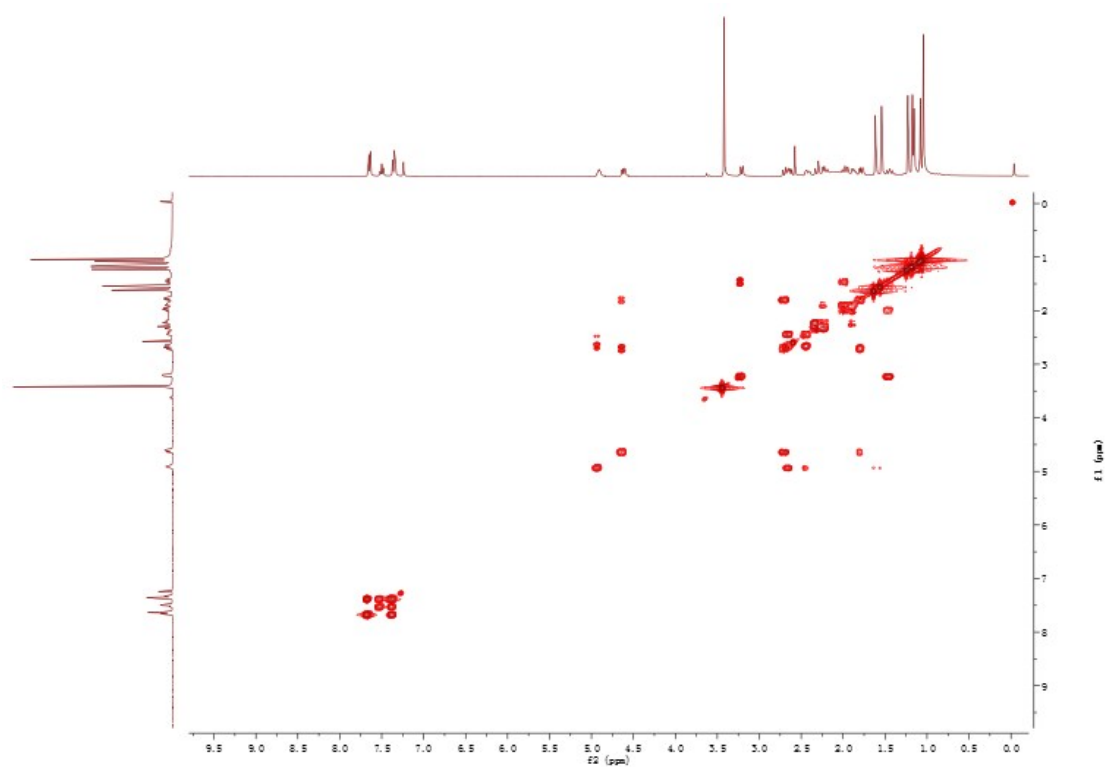

HMBC spectrum (AV-400) of hypersampsonne V (4) in CDCl<sub>3</sub>

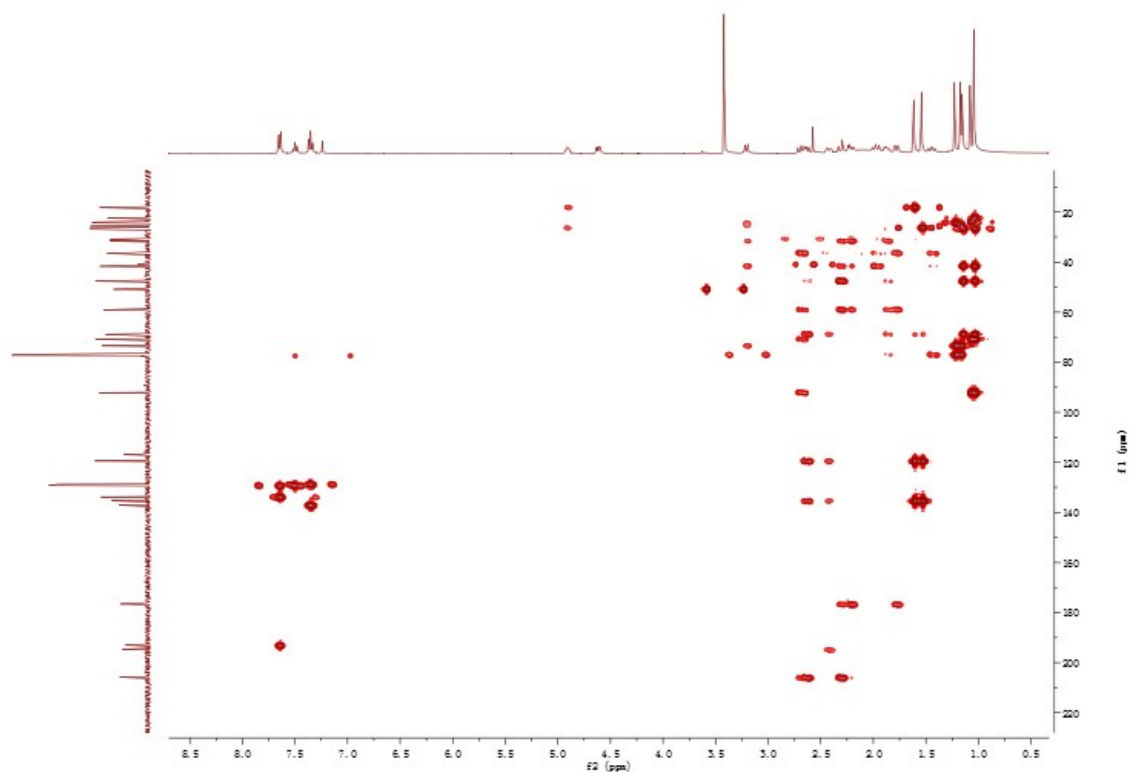

NOESY spectrum (AV-400) of hypersampsonne V (4) in CDCl<sub>3</sub>

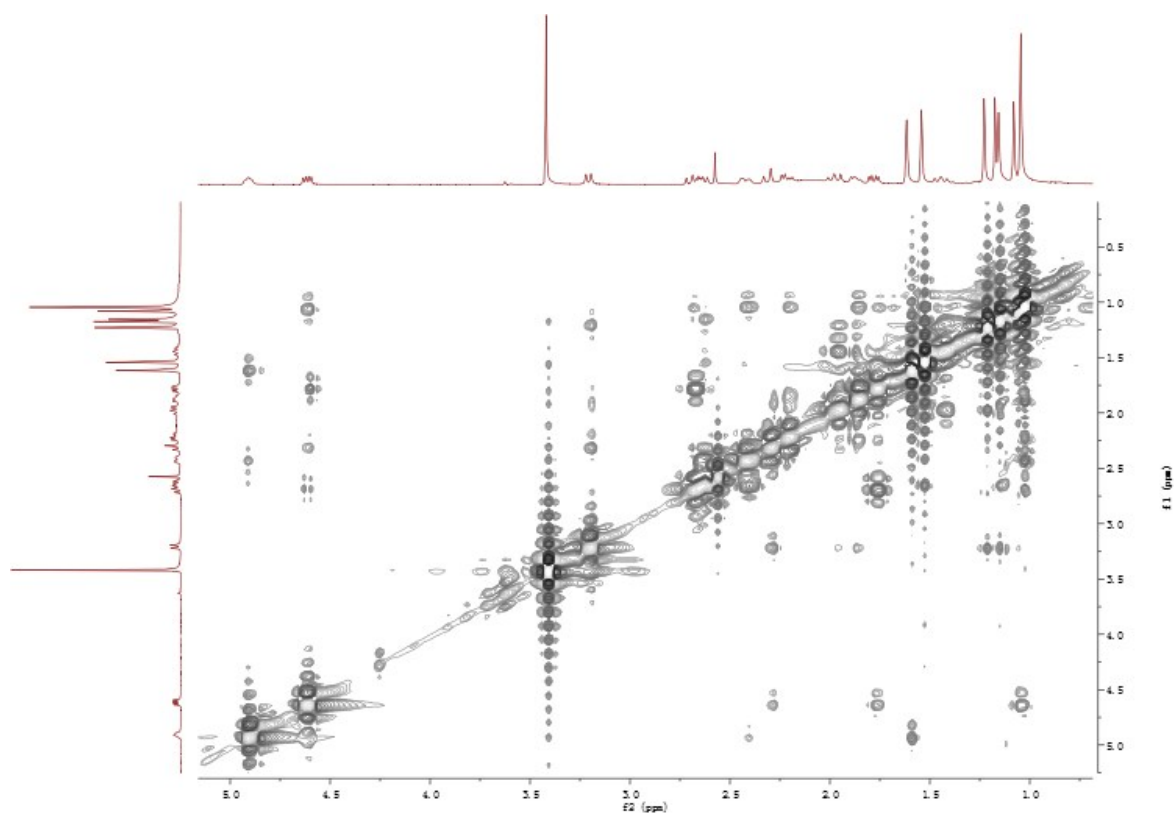

### UV spectrum of hypersampson W (5) in CH<sub>3</sub>OH.

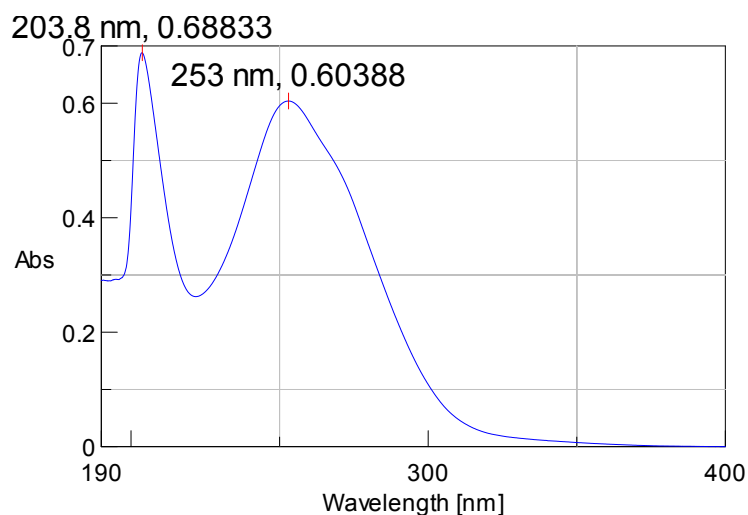

### IR (KBr disc) spectrum of hypersampson W (5).

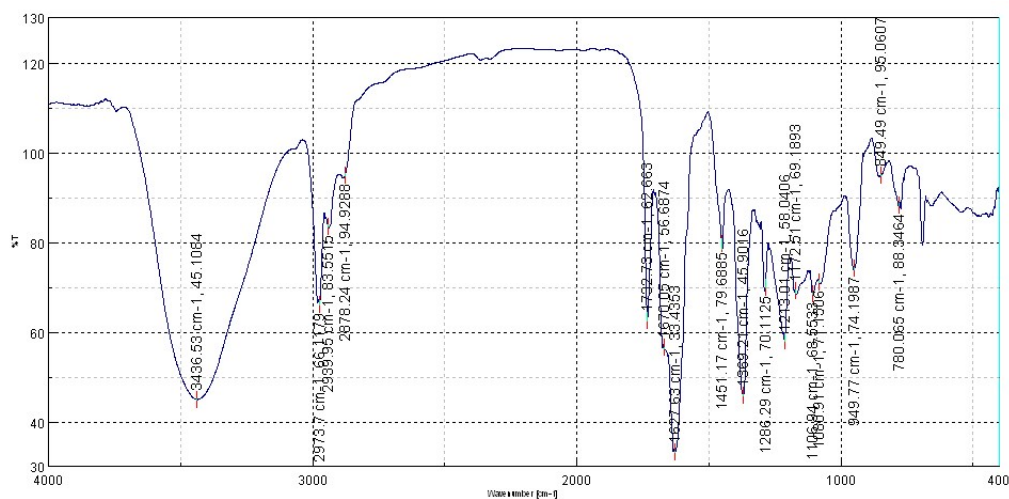

### HR-ESI-MS spectrum of hypersampson W (5).

#### Single Mass Analysis

Tolerance = 5.0 mDa / DBE: min = -1.5, max = 50.0

Element prediction: Off

Number of isotope peaks used for i-FIT = 3

Monoisotopic Mass, Even Electron Ions

150 formula(e) evaluated with 1 results within limits (up to 50 best isotopic matches for each mass)

Elements Used:

C: 0-500 H: 0-1000 O: 0-200

HSD7K2-2

20141201-27 710 (5.691)

1: TOF MS ES+  
1.42e+006

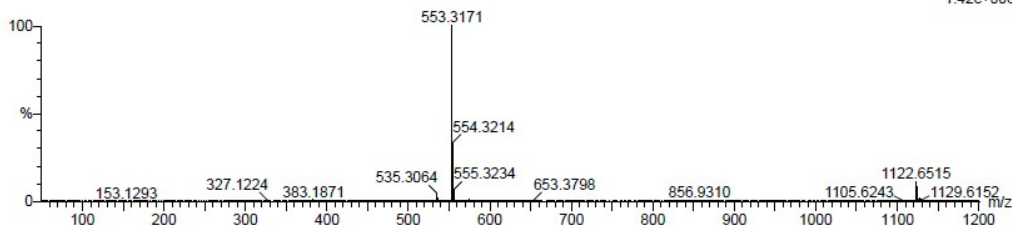

Minimum: -1.5  
Maximum: 50.0

| Mass     | Calc. Mass | mDa | PPM | DBE  | i-FIT | Norm | Conf (%) | Formula    |
|----------|------------|-----|-----|------|-------|------|----------|------------|
| 553.3171 | 553.3165   | 0.6 | 1.1 | 11.5 | 462.1 | n/a  | n/a      | C33 H45 O7 |

**<sup>1</sup>H NMR (AV-400, 400 MHz) spectrum of hypersampson W (4) in CDCl<sub>3</sub>**

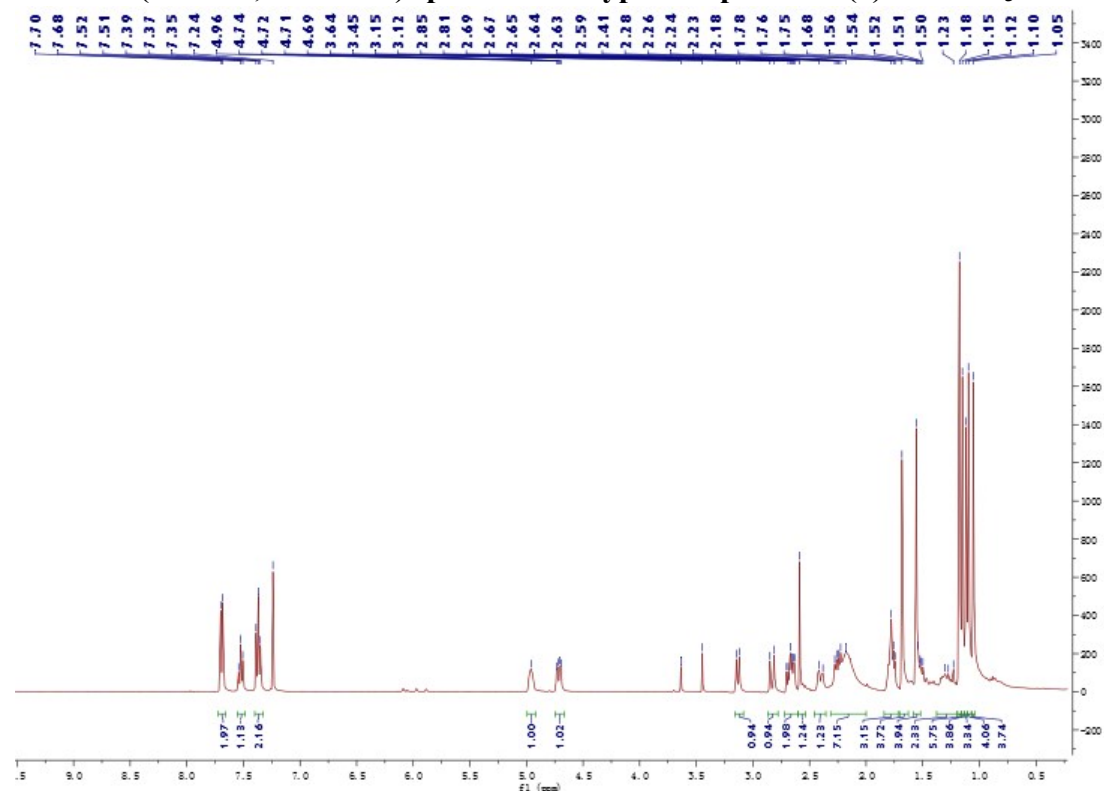

**<sup>13</sup>C NMR spectrum (AV-400, 100 MHz) of hypersampson W (4) in CDCl<sub>3</sub>**

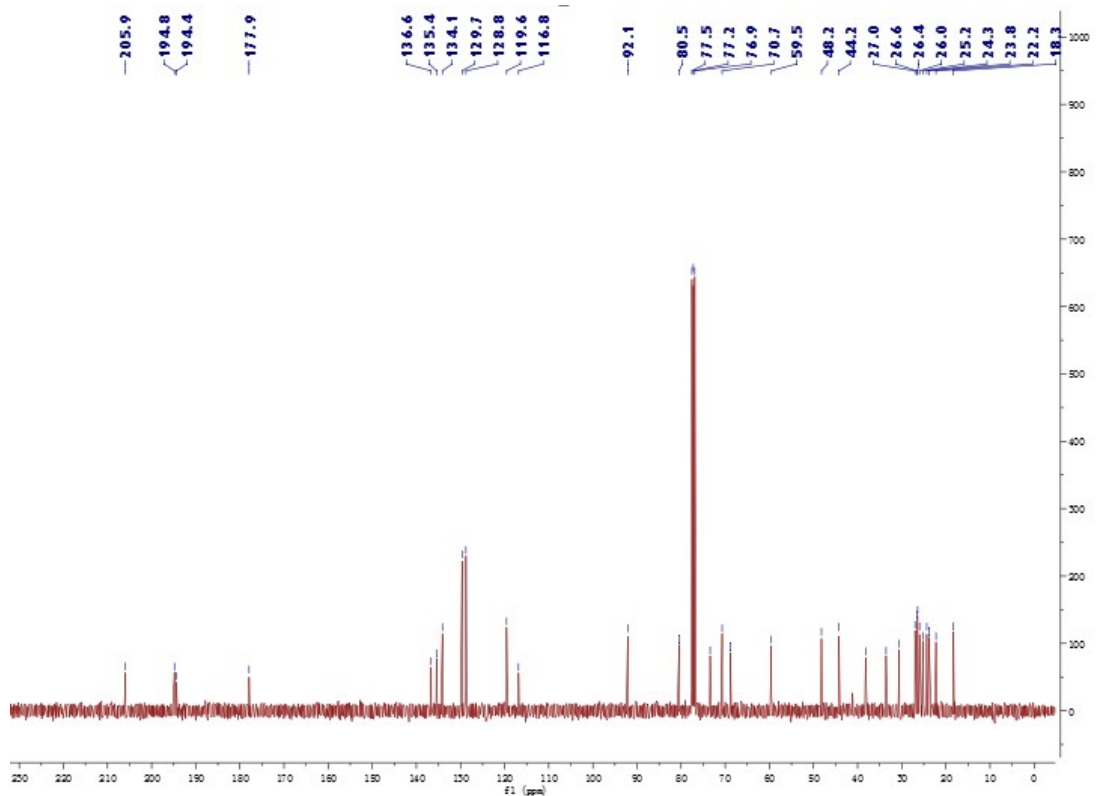

HSQC spectrum (AV-400) of hypersampsonone W (5) in CDCl<sub>3</sub>

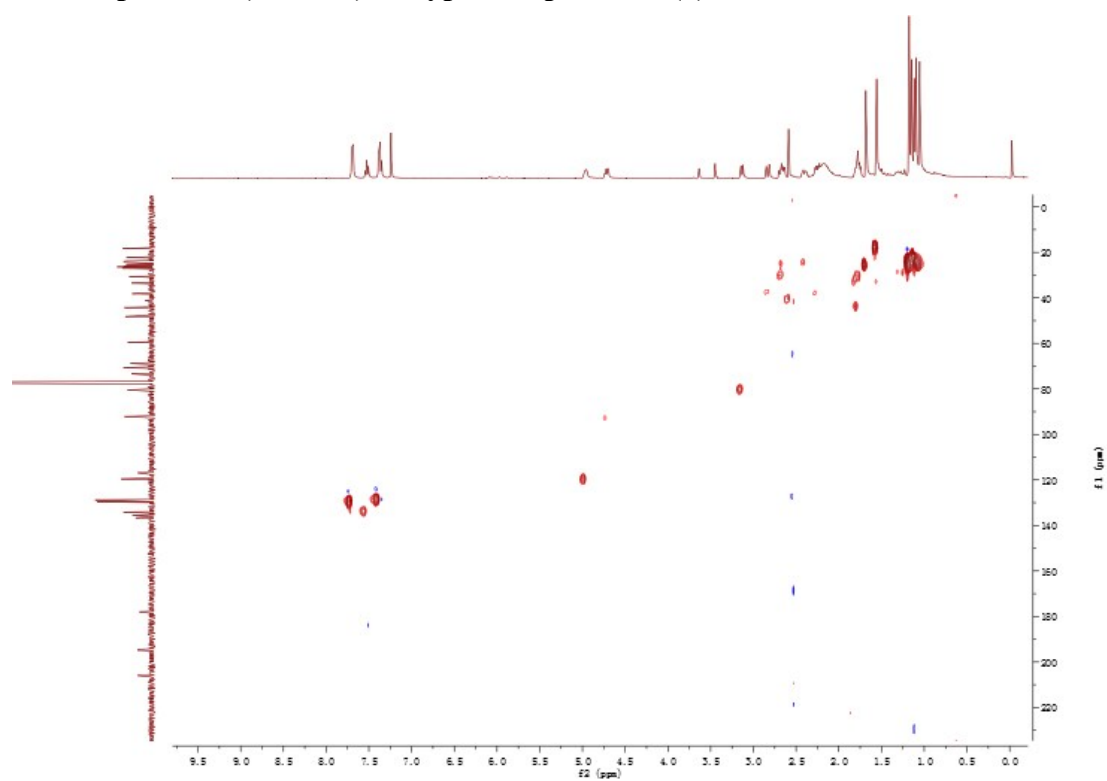

<sup>1</sup>H-<sup>1</sup>H COSY spectrum (AV-400) of hypersampsonone W (5) in CDCl<sub>3</sub>

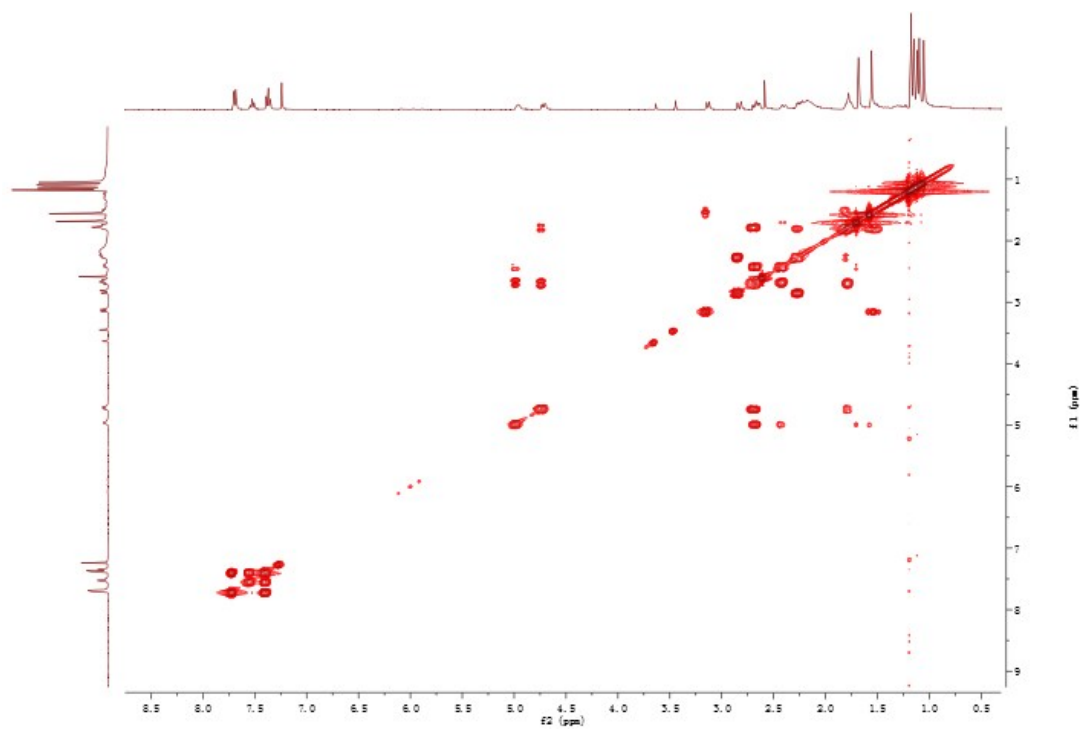

HMBC spectrum (AV-400) of hypersampsonse W (5) in CDCl<sub>3</sub>

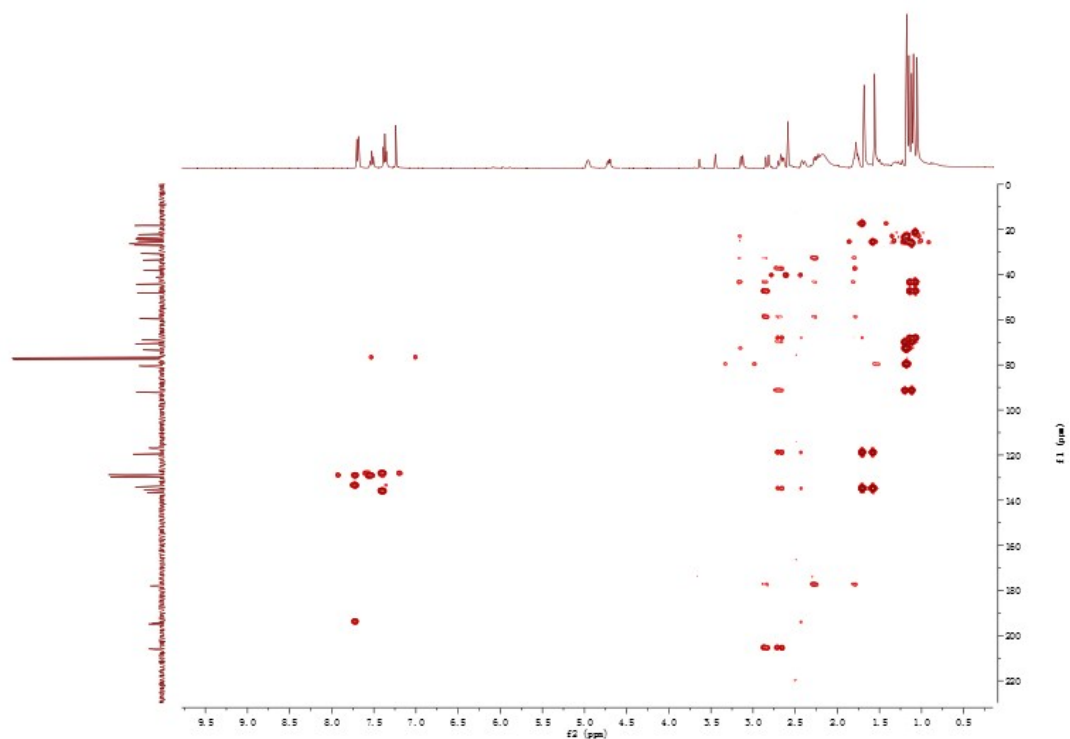

NOESY spectrum (AV-400) of hypersampsonse W (5) in CDCl<sub>3</sub>

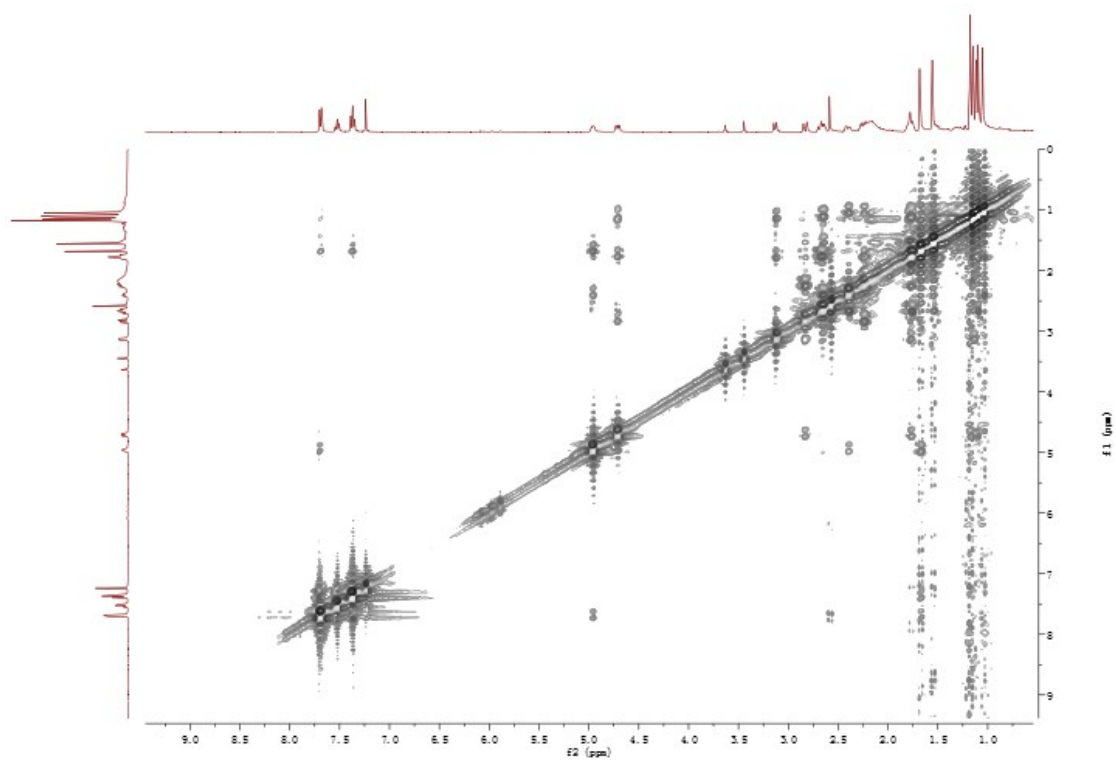

## Computational details of 2 and 3

Based on the known relative configuration, two pairs of enantiomers (1R,5S,7S)-**2a**, (1S,5R,7R)-**2b**, (1R,5S,7S,25S)-**3a** and (1S,5R,7R,25R)-**3b** was employed for the conformational random search using the Merck Molecular Force Field method in the Best module of Discovery studio 2.5.5 (Accelrys, San Diego, CA, 2009) software package. The conformations from conformational search results with an energy cut off of 17 kJ/mol (approximately 4 kcal/mol) was selected to further geometry optimization and ECD calculation. As a result, there were 2, 7, 14, 8 low energy conformations with an energy cut off of 4 kcal/mol for **2a**, **2b**, **3a**, **3b**, respectively (Figure 1).

The geometry of the molecules was optimized with Gaussian 09 package<sup>1</sup> at B3LYP/6-31G(d) computational level. The minimum nature of the structure was confirmed by frequency calculations at the same computational level.

Then quantum chemical theoretical calculations (Diedrich and Grimme, 2003) for ECD were carried out in the solvent medium using time-dependent density functional theory (TDDFT) with B3LYP functional and dgdzvp forcefield basis set with 60 electronic transitions. The energies, oscillator strengths, and rotational strengths of the electronic excitations of all the conformers were calculated using the TD-DFT method at the B3LYP/dgdzvp level.

Based on the relative energy, boltzmann weighted average of the different low energy conformations was calculated for **2a**, **2b**, **3a** and **3b**. The ECD for each molecule is calculated based on boltzmann weighted average of the conformations search results. Percentage for each conformations are shown in figure 1. As a result, the overall pattern of calculated ECD spectra of **2a**, **3a** were well matched the experimental data of **2** and **3** (Figure 2).

### Selected conformations of 2a and their percentage

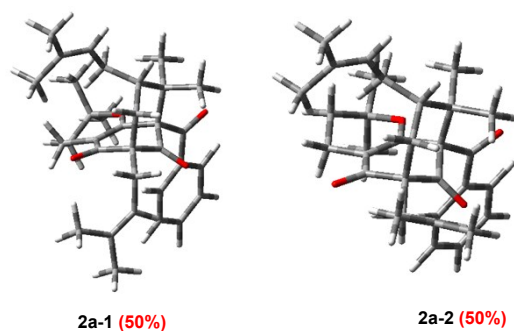



### Selected conformations of 2b and their percentage

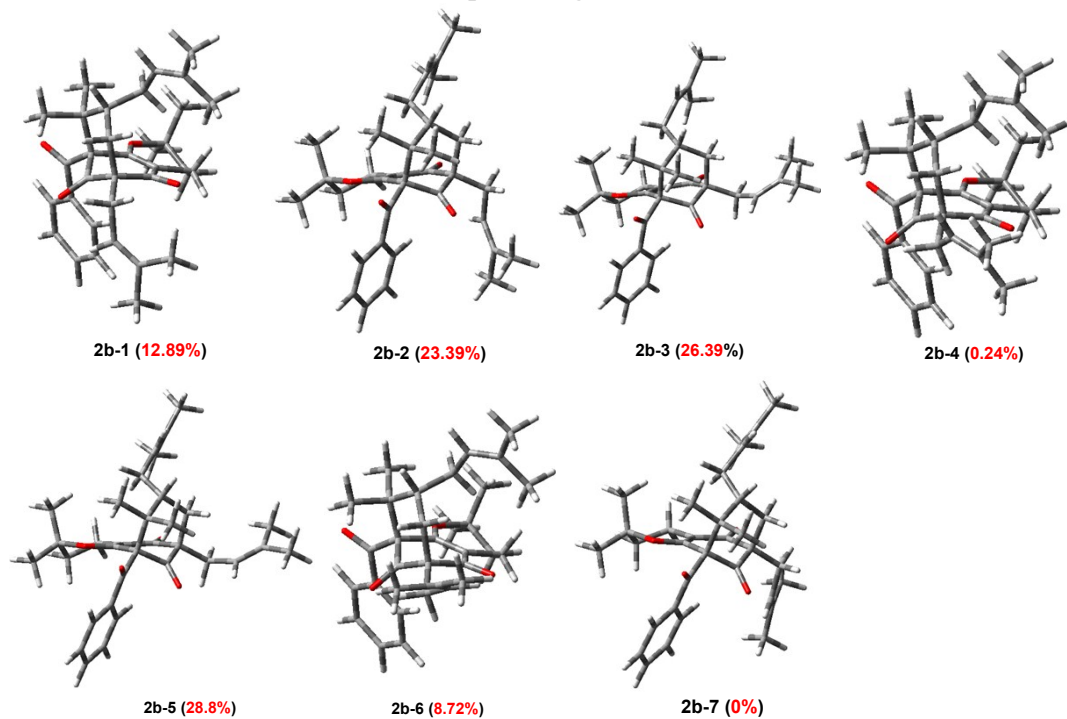

### Selected conformations of 3a and their percentage

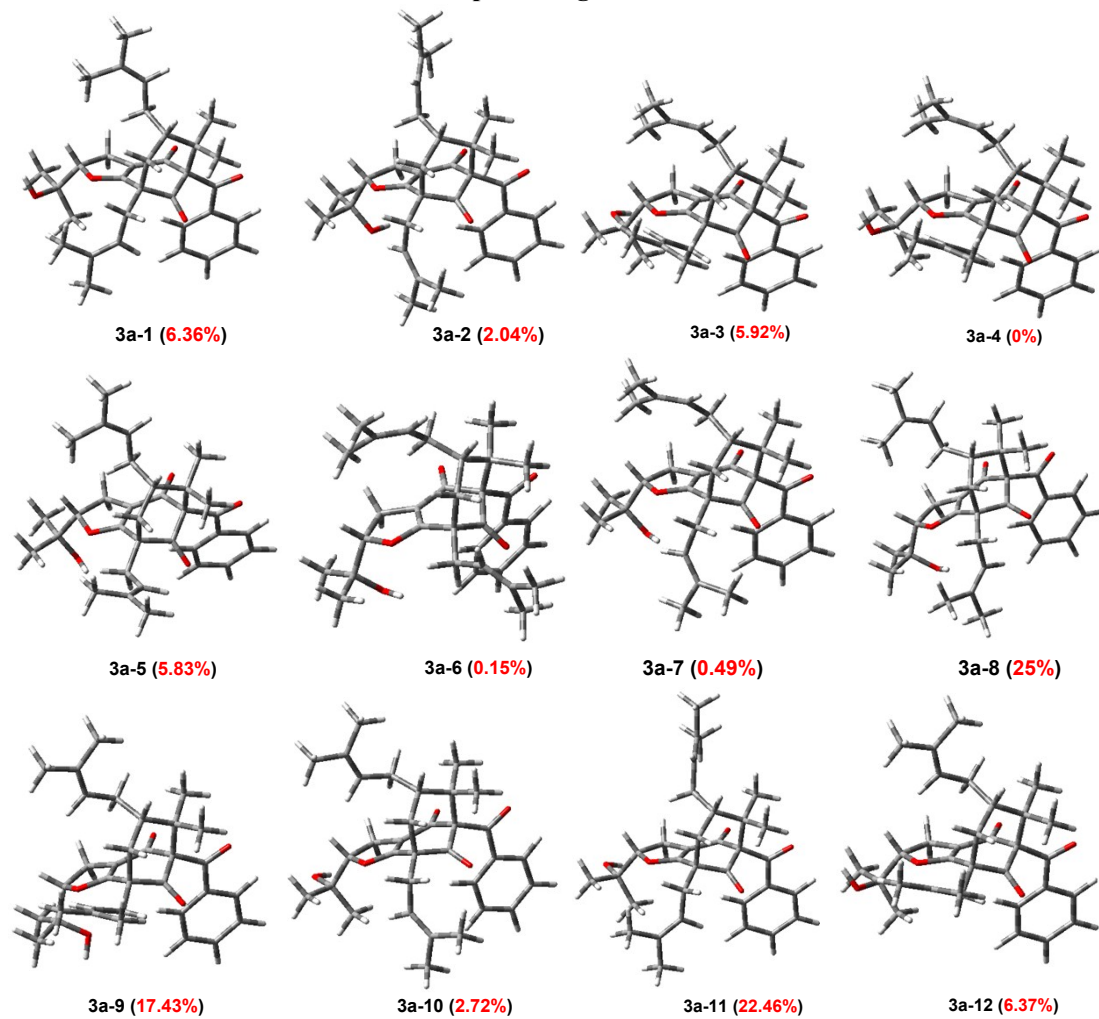

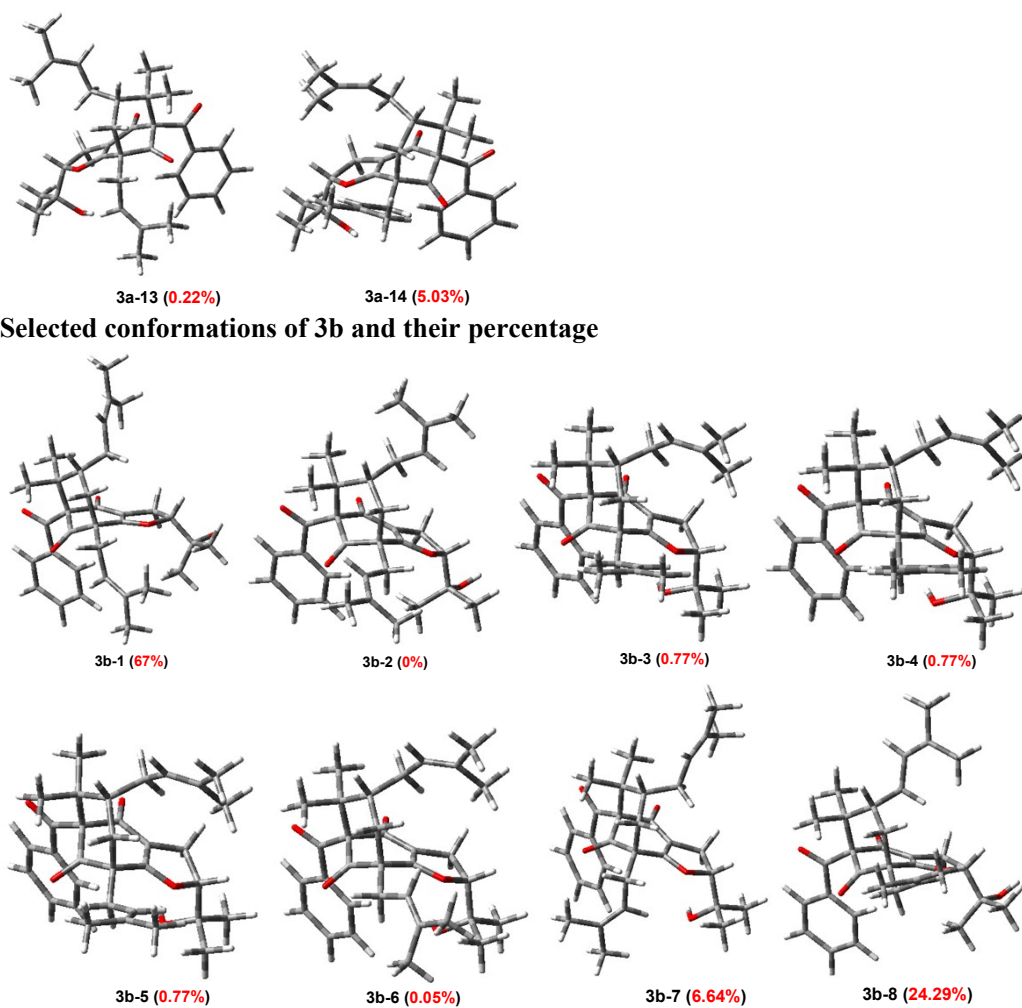

**Figure 1. Selected Low energy conformations for 2a, 2b, 3a, 3b and their percentage.**

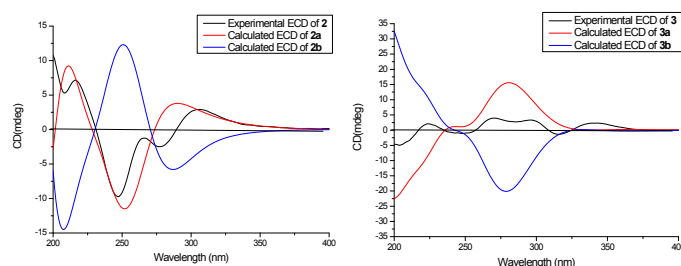

**Figure 2. Calculated ECD results of 2 and 3 based on Boltzmann weighted average of the selected low energy conformations.**

## Reference

(1) Frisch, M. J.; Trucks, G. W.; Schlegel, H. B.; Scuseria, G. E.; Robb, M. A.; Cheeseman, J. R.; Scalmani, G.; Barone, V.; Mennucci, B.; Petersson, G. A.; Nakatsuji, H.; Caricato, M.; Li, X.; Hratchian, H. P.; Izmaylov, A. F.; Bloino, J.; Zheng, G.; Sonnenberg, J. L.; Hada, M.; Ehara, M.; Toyota, K.; Fukuda, R.; Hasegawa, J.; Ishida, M.; Nakajima, T.; Honda, Y.; Kitao, O.; Nakai, H.; Vreven, T.; Montgomery, J. A.; Peralta, J. E.; Ogliaro, F.; Bearpark, M.; Heyd, J. J.; Brothers, E.; Kudin, K. N.; Staroverov, V. N.; Kobayashi, R.; Normand, J.; Raghavachari, K.; Rendell, A.; Burant, J. C.; Iyengar, S. S.; Tomasi, J.; Cossi, M.; Rega, N.; Millam, J. M.; Klene, M.; Knox, J. E.; Cross, J. B.; Bakken, V.; Adamo, C.; Jaramillo, J.; Gomperts, R.; Stratmann, R. E.; Yazyev, O.; Austin, A. J.; Cammi, R.; Pomelli, C.; Ochterski, J. W.; Martin, R. L.; Morokuma, K.; Zakrzewski, V. G.; Voth, G. A.; Salvador, P.; Dannenberg, J. J.; Dapprich, S.; Daniels, A. D.; Farkas, O.; Foresman, J. B.; Ortiz, J. V.; Cioslowski, J.; Fox, D. J. Gaussian, Inc., Wallingford CT, 2009.

## Bioassays

### RXR $\alpha$ transcriptional activity assay

**Cell Culture.** The human renal epithelial cells (293T) (ATCC) were cultured in 37 °C in DMEM (Hyclone) containing 10% fetal bovine serum (FBS, Hyclone) for 24 h.

**Experimental Methods.** The previous dual-luciferase reporter gene assay with some modification was used in the present study <sup>1,2</sup>. In brief, approximately  $4 \times 10^4$  cells / well were seeded in 48-well plates. The two target plasmids, 20 ng pBind RXR $\alpha$  LBD (provided by Dr. Xiao-kun Zhang from the Burnham Institute for Medical Research, Cancer Center, La Jolla, CA, USA.) and 60 ng PG5 LUC (provided by Dr. Xiao-kun Zhang from the Burnham Institute for Medical Research, Cancer Center, La Jolla, CA, USA.), were transfected by Liposome 2000 (Invitrogen) in the cell. After 24 h, the cells were exposed to the test compound for 12 h. Then the cells were rinsed with PBS and lysed by buffered solution ( $1 \times$  PLB) on the oscillating platform for 15 minutes. According to the introduction of the Dual-Luciferase Reporter Assay System kit(promega), the activities of Firefly luciferase (FL) and Rellina luciferase (RL) were checked.

$$\text{Relative luciferase activity (\%)} = \text{FL} / \text{RL} \times 100\%$$

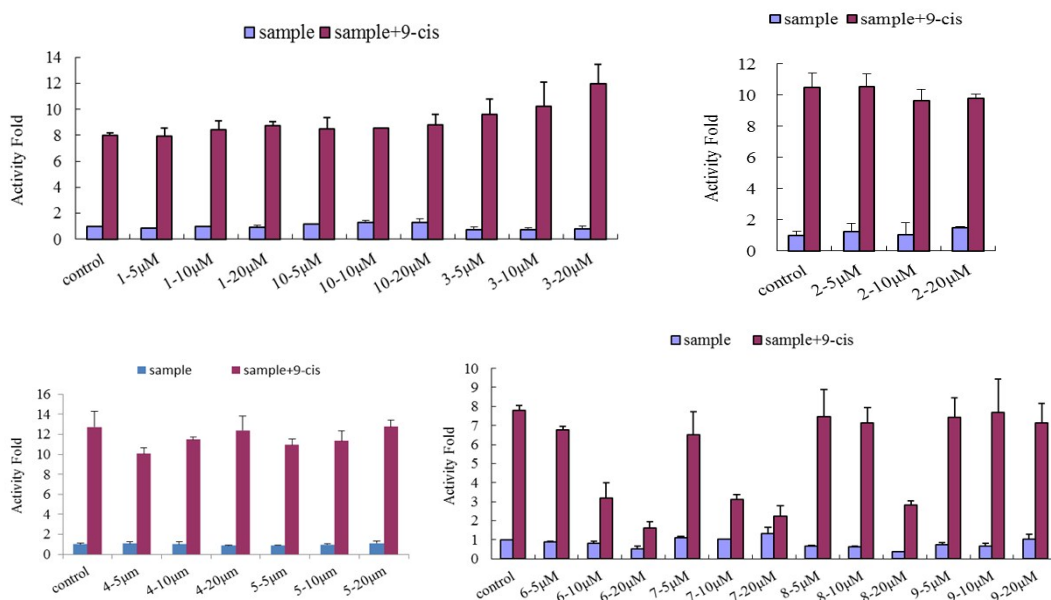

Chart 1. Effects of compounds 1-10 (5, 10, and 20  $\mu$ M) on the transcriptional activities of RXR $\alpha$

## Cytotoxicity assay

**Cell Culture.** Human cervical carcinoma HeLa cells were obtained from the {American Type Culture Collection (ATCC, Manassas, VA, USA)} and were cultured in {DMEM (Hyclone)} supplemented with 10% FBS (Fetal Bovine Serum, Hyclone, USA), 100U/mL penicillin (Hyclone), and 100  $\mu\text{g}/\text{mL}$  streptomycin (Hyclone) at 37 °C with 5% CO<sub>2</sub> in a humidified atmosphere. The cells in the exponential phase of growth were used in the experiments.

**MTT assay.** All test samples were dissolved in dimethyl sulfoxide (DMSO) to make stock solutions and further diluted in culture medium upon assay. HeLa cells were incubated in 96-well cell culture clusters (JET) at a density of  $0.5 \times 10^4$  cells per well and cultured for 12 h. Thereafter, the cells were treated with 5, 10 and 20  $\mu\text{M}$  concentrations of **1-10** respectively. After cultured for 48 h, 20  $\mu\text{L}$  of MTT (Solarbio) solution was added and the cells were incubated for an additional 4 h at 37 °C. Then the supernatant was discarded, and the deposited formazan formed in the cells was dissolved with 100  $\mu\text{L}$  of DMSO. All optical densities were measured in the MTT assay using a microplate reader (Thermo Multiskan MK3, Thermo Scientific, Helsinki, Finland). The percentage of cell growth rate was calculated as follows:

$$\text{Growth Rate (\%)} = (\text{OD}_{\text{sample}} - \text{OD}_{\text{blank}}) / (\text{OD}_{\text{control}} - \text{OD}_{\text{blank}}) \times 100$$

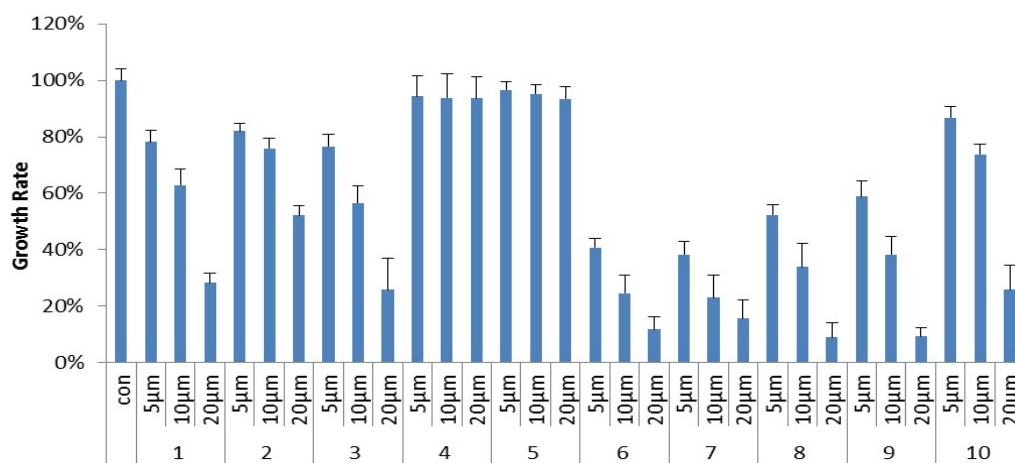

Chart 3. Effects of compounds 1-10 (5, 10, and 20  $\mu\text{M}$ ) on the cytotoxic effects

## Reference

- (1) Zhang, X. K.; Lehmann, J.; Hoffmann, B.; Dawson, M. I.; Cameron, J.; Graupner, G.; Hermann, T.; Tran, P.; Pfahl, M. *Nature* **1992**, 358, 587–591.
- (2) Duan, Y.H.; Dai, Y.; Wang, G.H.; Zhang, X.; Chen, H.F.; Chen, J.B.; Yao, X.S.; Zhang, X.K. *J. Nat. Prod.* **2010**, 73, 1283-1287.
